# Supplementary material for: Solvent-free hydrosilylation of alkenes and alkynes using recyclable platinum on carbon nanotubes
Source: Royal Society of Chemistry journal article supplement (doi:10.1039/d0gc03943h), 2021-01-01
Supplement: d0gc03943h1.pdf [file d0gc03943h1.pdf]

# Solvent-free hydrosilylation of alkenes and alkynes using recyclable platinum on carbon nanotubes

Dhanaji V. Jawale, Valérie Geertsen, Frédéric Miserque, Patrick Berthault, Edmond Gravel  
and Eric Doris

## Table of contents

|                                           |     |
|-------------------------------------------|-----|
| 1. Spectroscopic data .....               | S1  |
| 2. Copies of NMR spectra .....            | S8  |
| 3. Supplementary Figures (XPS, KIE) ..... | S42 |
| 4. Supplementary Table (Recycling) .....  | S45 |

## General

Chemicals were purchased from Sigma-Aldrich and used as received. Electron microscopy observations were carried out on a Philips CM12 microscope operated at 100 kV. NMR spectra were recorded on a Bruker Avance spectrometer at 400 MHz ( $^1\text{H}$ ), 100 MHz ( $^{13}\text{C}$ ), and 61 MHz ( $^2\text{H}$ ). Chemical shifts are given in ppm relative to the NMR solvent residual peak.  $^{29}\text{Si}$  NMR experiments were performed at 298 K on a 500 MHz Avance II Bruker spectrometer equipped with an inverse broadband 5 mm probe head ( $^{29}\text{Si}$  NMR frequency: 99.362 MHz). Spectra were acquired with 64 scans and an interscan delay of 60 sec. Chemical shifts are calibrated considering the signal of triethylsilane at 0 ppm. XPS spectra were acquired on a VG ESCALAB 210 spectrometer. HRMS were recorded on a Waters Xevo G2-XS QToF spectrometer.

## 1. Spectroscopic data

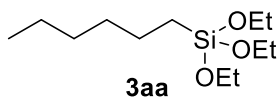

$^1\text{H-NMR}$  (400 MHz,  $\text{CDCl}_3$ )  $\delta$  0.57 (t, 2H), 0.81 (t, 3H), 1.12–1.38 (m, 17H), 3.72–3.81 (m, 6H) ppm.<sup>1</sup>

$^{13}\text{C-NMR}$  (100 MHz,  $\text{CDCl}_3$ )  $\delta$  10.5, 14.3, 18.4, 22.7, 22.9, 31.6, 33.0, 58.4 ppm.

$^{29}\text{Si-NMR}$  (99.3 MHz,  $\text{CDCl}_3$ )  $\delta$  7.04 ppm.

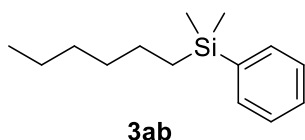

$^1\text{H-NMR}$  (400 MHz,  $\text{CDCl}_3$ )  $\delta$  0.41 (s, 6H), 0.91 (t, 2H), 1.02 (t, 3H), 1.42–1.47 (m, 8H), 7.48 (m, 3H, ArH), 7.65 (m, 2H, ArH) ppm.<sup>2</sup>

$^{13}\text{C-NMR}$  (100 MHz,  $\text{CDCl}_3$ )  $\delta$  -2.9, 14.3, 16.0, 22.8, 24.0, 31.7, 33.5, 127.8, 128.9, 133.7, 139.8 ppm.

$^{29}\text{Si-NMR}$  (99.3 MHz,  $\text{CDCl}_3$ )  $\delta$  -3.23 ppm.

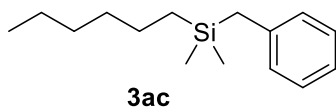

$^1\text{H-NMR}$  (400 MHz,  $\text{CDCl}_3$ )  $\delta$  0.00 (s, 6H), 0.54 (t, 2H), 0.93 (t, 3H), 1.32 (m, 8H), 2.12 (s, 2H), 7.11 (m, 3H, ArH), 7.24 (dd, 2H, ArH) ppm.<sup>3</sup>

$^{13}\text{C-NMR}$  (100 MHz,  $\text{CDCl}_3$ )  $\delta$  -3.5, 14.3, 15.0, 22.7, 23.8, 25.7, 31.7, 33.4, 123.9, 128.1, 128.2, 140.6 ppm.

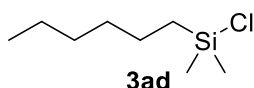

$^1\text{H-NMR}$  (400 MHz,  $\text{CDCl}_3$ ):  $\delta$  0.40 (s, 6H), 0.80 (t, 2H), 0.91 (t, 3H), 1.24–1.45 (m, 8H) ppm.<sup>4</sup>

$^{13}\text{C-NMR}$  (100 MHz,  $\text{CDCl}_3$ , ppm)  $\delta$  1.8, 14.3, 19.2, 22.7, 23.1, 31.6, 32.8 ppm.

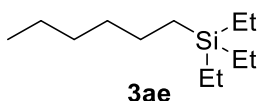

$^1\text{H-NMR}$  (400 MHz,  $\text{CDCl}_3$ )  $\delta$  0.47–0.53 (m, 8H), 0.87–0.98 (m, 12H), 1.23–1.34 (m, 8H) ppm.<sup>5</sup>

$^{13}\text{C-NMR}$  (100 MHz,  $\text{CDCl}_3$ )  $\delta$  3.5, 7.6, 11.5, 14.3, 22.8, 24.0, 32.0, 33.8 ppm.

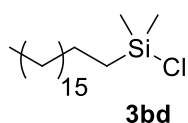

$^1\text{H-NMR}$  (400 MHz,  $\text{CDCl}_3$ , ppm)  $\delta$  0.41 (s, 6H), 0.88, (t, 2H), 0.92 (t, 3H), 1.23–1.46 (m, 32H) ppm.

$^{13}\text{C-NMR}$  (100 MHz,  $\text{CDCl}_3$ , ppm)  $\delta$  1.8, 14.3, 19.2, 22.9, 23.2, 29.5, 29.6, 29.8, 29.9, 30.0, 32.2, 33.2 ppm.

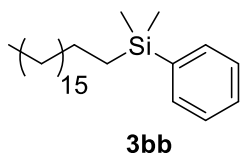

$^1\text{H-NMR}$  (400 MHz,  $\text{CDCl}_3$ )  $\delta$  0.37 (s, 6H), 0.87, (t, 2H), 1.0 (t, 3H), 1.39–1.55 (m, 32H), 7.44 (m, 3H, ArH), 7.61 (m, 2H, ArH) ppm.<sup>6</sup>

$^{13}\text{C-NMR}$  (100 MHz,  $\text{CDCl}_3$ )  $\delta$  -2.9, 14.3, 15.9, 22.9, 24.0, 27.1, 29.5, 29.6, 28.8, 29.9, 32.1, 33.8, 128.0, 128.8, 133.6, 139.8 ppm.

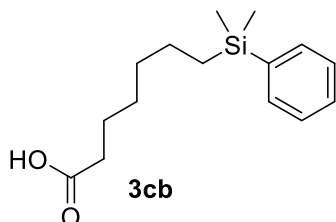

$^1\text{H-NMR}$  (400 MHz,  $\text{CDCl}_3$ )  $\delta$  0.27 (s, 6H), 0.76, (t, 2H), 1.28–1.38 (m, 6H), 1.61 (m, 2H), 2.34 (t, 2H), 7.36 (m, 3H, ArH), 7.52 (m, 2H, ArH) ppm.

$^{13}\text{C-NMR}$  (100 MHz,  $\text{CDCl}_3$ )  $\delta$  -3.0, 15.7, 23.7, 24.6, 28.7, 33.2, 34.1, 127.7, 128.8, 133.6, 139.6, 180.4 ppm.

HRESMS  $m/z$  263.1465 (calcd for  $\text{C}_{15}\text{H}_{23}\text{O}_2\text{Si}$ , 263.1467 [ $\text{M} - \text{H}$ ]<sup>-</sup>).

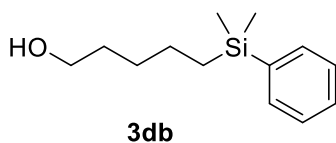

$^1\text{H-NMR}$  (400 MHz,  $\text{CDCl}_3$ )  $\delta$  0.26 (s, 6H), 0.76 (t, 2H), 1.24–1.37 (m, 4H), 1.51–1.62 (m, 2H), 3.60 (t, 2H), 7.35 (m, 3H, ArH), 7.50 (m, 2H, ArH) ppm.<sup>7</sup>

$^{13}\text{C-NMR}$  (100 MHz,  $\text{CDCl}_3$ )  $\delta$  -3.3, 15.7, 23.7, 29.6, 32.5, 63.0, 127.7, 128.8, 133.6, 139.6 ppm.

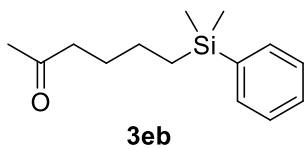

$^1\text{H-NMR}$  (400 MHz,  $\text{CDCl}_3$ )  $\delta$  0.15 (s, 6H), 0.64, (t, 2H), 1.21 (m, 2H), 1.47 (m, 2H), 1.95 (s, 3H), 2.25 (t, 3H), 7.22 (m, 3H, ArH), 7.38 (m, 2H, ArH) ppm.<sup>8</sup>

$^{13}\text{C-NMR}$  (100 MHz,  $\text{CDCl}_3$ )  $\delta$  -3.1, 15.5, 23.5, 27.5, 29.7, 43.3, 127.7, 128.7, 133.4, 139.2 ppm.

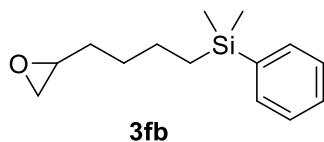

$^1\text{H-NMR}$  (400 MHz,  $\text{CDCl}_3$ )  $\delta$  0.36 (s, 6H), 0.86, (t, 2H), 1.43–1.57 (m, 6H), 2.47 (q, 1H), 2.76 (t, 1H), 2.92 (q, 1H), 7.42 (m, 3H, ArH), 7.52 (dd, 2H, ArH) ppm.<sup>9</sup>

$^{13}\text{C-NMR}$  (100 MHz,  $\text{CDCl}_3$ )  $\delta$  -3.1, 15.63, 23.7, 29.7, 32.0, 46.9, 52.1, 127.7, 128.7, 133.4, 139.3 ppm.

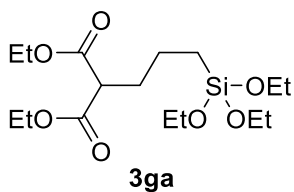

$^1\text{H-NMR}$  (400 MHz,  $\text{CDCl}_3$ )  $\delta$  0.66 (t, 2H), 1.21–1.29 (m, 15H), 1.47 (m, 2H), 1.94 (q, 2H), 3.36 (t, 1H), 3.83 (m, 6H), 4.19 (q, 4H) ppm.<sup>10</sup>

$^{13}\text{C-NMR}$  (100 MHz,  $\text{CDCl}_3$ )  $\delta$  10.1, 14.1, 18.3, 20.8, 32.0, 51.8, 58.4, 61.3, 169.5 ppm.

HRESMS  $m/z$  387.1789 (calcd for  $\text{C}_{16}\text{H}_{32}\text{NaO}_7\text{Si}$ , 387.1815  $[\text{M} + \text{Na}]^+$ ).

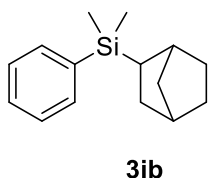

$^1\text{H-NMR}$  (400 MHz,  $\text{CDCl}_3$ )  $\delta$  0.26 (s, 3H), 0.28 (s, 3H), 0.85 (m, 1H), 1.09–1.12 (m, 2H), 1.21–1.29 (m, 2H), 1.40–1.59 (m, 4H), 2.25 (m, 2H), 7.36–7.38 (m, 3H, ArH), 7.53–7.56 (m, 2H, ArH) ppm.<sup>11</sup>

$^{13}\text{C-NMR}$  (100 MHz,  $\text{CDCl}_3$ )  $\delta$  -4.1, -4.0, 28.6, 28.9, 32.8, 34.4, 37.0, 37.8, 38.0, 127.7, 128.7, 134.0, 139.4 ppm.

$^{29}\text{Si-NMR}$  (99.3 MHz,  $\text{CDCl}_3$ )  $\delta$  -3.38 ppm.

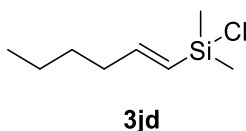

$^1\text{H-NMR}$  (400 MHz,  $\text{CDCl}_3$ )  $\delta$  0.36 (s, 6H), 0.80 (t, 3H), 1.21–1.30 (m, 4H), 2.05 (m, 2H), 5.61 (d, 1H), 6.16 (m, 1H) ppm.<sup>12</sup>

$^{13}\text{C-NMR}$  (100 MHz,  $\text{CDCl}_3$ )  $\delta$  2.1, 14.1, 22.4, 33.6, 36.2, 126.1, 151.3 ppm.

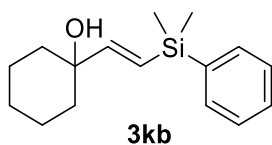

$^1\text{H-NMR}$  (400 MHz,  $\text{CDCl}_3$ )  $\delta$  0.34 (s, 6H), 0.74 (t, 4H), 0.84–1.23–1.35 (m, 2H), 1.49–1.71 (m, 10H), 6.03 (d, 1H), 6.24 (d, 1H), 7.33–7.36 (m, 3H, ArH), 7.50–7.52 (m, 2H, ArH) ppm.<sup>13</sup>

$^{13}\text{C-NMR}$  (100 MHz,  $\text{CDCl}_3$ )  $\delta$  -2.3, 22.1, 25.7, 37.5, 72.8, 123.3, 127.9, 129.1, 134.0, 139.0, 155.4 ppm.

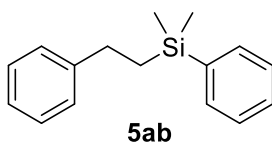

$^1\text{H-NMR}$  (400 MHz,  $\text{CDCl}_3$ )  $\delta$  0.50 (s, 6H), 1.34 (m, 2H), 2.85 (m, 2H), 7.38 (m, 3H, ArH), 7.47 (m, 2H, ArH), 7.56 (m, 3H, ArH), 7.75 (m, 2H, ArH) ppm.<sup>14</sup>

$^{13}\text{C-NMR}$  (100 MHz,  $\text{CDCl}_3$ )  $\delta$  -2.9, 17.8, 30.1, 125.7, 127.9, 127.9, 128.4, 129.1, 133.7, 139.1, 145.1 ppm.

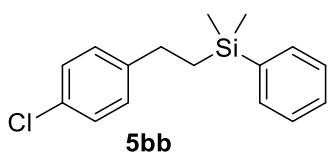

$^1\text{H-NMR}$  (400 MHz,  $\text{CDCl}_3$ )  $\delta$  0.50 (s, 6H), 1.28 (m, 2H), 2.79 (m, 2H), 7.24 (d, 2H, ArH), 7.41 (d, 2H, ArH), 7.56 (m, 3H, ArH), 7.74 (m, 2H, ArH) ppm.<sup>15</sup>

$^{13}\text{C-NMR}$  (100 MHz,  $\text{CDCl}_3$ )  $\delta$  -3.0, 17.8, 29.5, 128.0, 128.4, 129.1, 129.4, 131.3, 133.7, 138.8, 143.4 ppm.

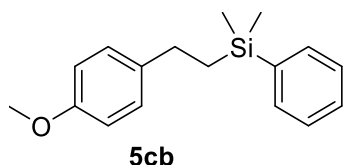

$^1\text{H-NMR}$  (400 MHz,  $\text{CDCl}_3$ )  $\delta$  0.35 (s, 6H), 1.16 (m, 2H), 2.65 (m, 2H), 3.83 (s, 3H), 6.87 (d, 2H, ArH), 7.14 (m, 2H, ArH), 7.41 (m, 3H, ArH), 7.58 (m, 2H, ArH) ppm.<sup>16</sup>

$^{13}\text{C-NMR}$  (100 MHz,  $\text{CDCl}_3$ )  $\delta$  -3.0, 18.0, 29.1, 55.3, 113.7, 127.9, 128.7, 129.0, 133.7, 137.1, 139.2, 157.6 ppm.

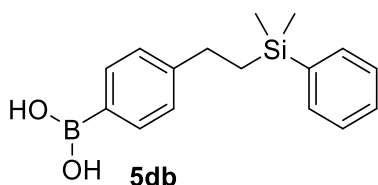

$^1\text{H-NMR}$  (400 MHz,  $\text{CDCl}_3$ )  $\delta$  0.45 (s, 6H), 1.29 (m, 2H), 2.82 (m, 2H), 7.39 (d, 2H, ArH), 7.51 (m, 2H, ArH), 7.68 (m, 2H, ArH), 8.24 (m, 2H, ArH) ppm.

$^{13}\text{C-NMR}$  (100 MHz,  $\text{CDCl}_3$ )  $\delta$  -2.9, 17.6, 30.5, 127.6, 128.0, 129.1, 133.7, 135.9, 139.0, 150.0 ppm.

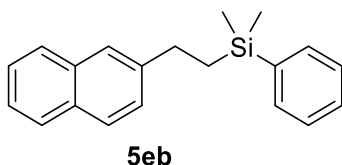

$^1\text{H-NMR}$  (400 MHz,  $\text{CDCl}_3$ )  $\delta$  0.41 (s, 6H), 1.30 (m, 2H), 2.88 (m, 2H), 7.39 (d, 1H, ArH), 7.44–7.53 (m, 5H, ArH), 7.63–7.67 (m, 3H, ArH), 7.81–7.87 (m, 3H, ArH) ppm.<sup>17</sup>

$^{13}\text{C-NMR}$  (100 MHz,  $\text{CDCl}_3$ )  $\delta$  -2.9, 17.7, 30.2, 125.1, 125.5, 125.9, 127.1, 127.5, 127.7, 127.9, 129.0, 132.0, 133.7, 133.8, 139.1, 142.6 ppm.

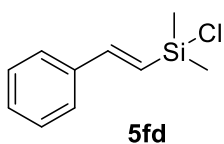

$^1\text{H-NMR}$  (400 MHz,  $\text{CDCl}_3$ )  $\delta$  0.66 (s, 6H), 6.51 (d, 1H), 7.13 (d, 1H), 7.42 (m, 3H, ArH), 7.53 (dd, 2H, ArH) ppm.<sup>18</sup>

$^{13}\text{C-NMR}$  (100 MHz,  $\text{CDCl}_3$ )  $\delta$  2.2, 124.7, 127.0, 128.8, 129.0, 137.3, 146.7 ppm.

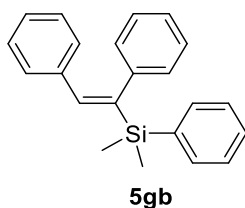

$^1\text{H-NMR}$  (400 MHz,  $\text{CDCl}_3$ , ppm):  $\delta$  0.39 (s, 6H), 6.82 (s, 1H), 6.88-6.96 (m, 4H, ArH), 7.05-7.10 (m, 3H, ArH), 7.14-7.25 (m, 3H, ArH), 7.33-7.38 (m, 3H, ArH), 7.52-7.58 (m, 2H, ArH).<sup>19</sup>

$^{13}\text{C NMR}$  (100 MHz,  $\text{CDCl}_3$ )  $\delta$  -3.0, 125.7, 127.2, 127.7, 127.8, 127.9, 128.6, 129.1, 129.6, 134.3, 137.2, 137.7, 139.2, 142.3, 145.0 ppm.

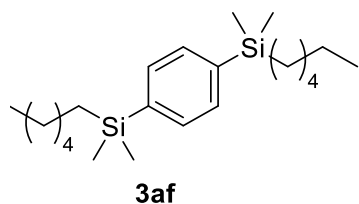

$^1\text{H-NMR}$  (400 MHz,  $\text{CDCl}_3$ )  $\delta$  -0.24 (s, 12H), 0.74 (t, 4H), 0.84–0.88 (m, 6H), 1.24–1.32 (m, 16H), 7.49–7.51 (s, 4H) ppm.<sup>20</sup>

$^{13}\text{C-NMR}$  (100 MHz,  $\text{CDCl}_3$ )  $\delta$  -3.0, 14.1, 15.6, 22.6, 23.8, 31.5, 33.3, 132.8, 140.2 ppm.

$^{29}\text{Si-NMR}$  (99.3 MHz,  $\text{CDCl}_3$ )  $\delta$  -3.40 ppm.

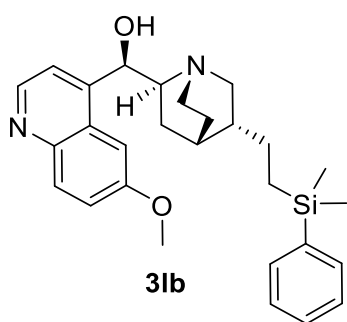

$^1\text{H-NMR}$  (400 MHz,  $\text{CDCl}_3$ )  $\delta$  0.20 (s, 6H), 0.64 (t, 2H), 1.21–1.27 (m, 2H), 1.40–1.45 (m, 2H), 1.64–1.80 (m, 3H), 2.35 (d, 1H), 2.63 (d, 2H), 3.02–3.13 (m, 2H), 3.32–3.35 (m, 1H), 3.90 (s, 3H), 5.50 (d, 2H), 7.25–7.37 (m, 5H, ArH), 7.42 (d, 1H, ArH), 7.44 (d, 2H, ArH), 7.50 (d, 2H, ArH), 8.03 (d, 2H, ArH), 8.73 (d, 2H, ArH) ppm.

$^{13}\text{C-NMR}$  (100 MHz,  $\text{CDCl}_3$ )  $\delta$  -3.2, 13.5, 21.8, 25.3, 28.3, 28.7, 38.8, 43.3, 55.7, 58.7, 59.8, 72.3, 101.3, 118.4, 121.6, 126.7, 127.7, 128.9, 131.8, 133.4, 139.2, 144.4, 147.2, 147.7, 157.8 ppm.

HRESMS  $m/z$  461.2630 (calcd for  $\text{C}_{28}\text{H}_{37}\text{N}_2\text{O}_2\text{Si}$ , 461.2624 for  $[\text{M} + \text{H}]^+$ ).

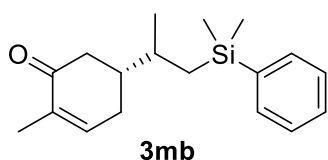

$^1\text{H-NMR}$  (400 MHz,  $\text{CDCl}_3$ )  $\delta$  0.30 (s, 6H), 0.61 (m, 1H), 0.86 (t, 3H), 0.93 (m, 1H), 1.62 (m, 1H), 1.75 (s, 3H), 1.79–2.47 (m, 5H), 6.69 (m, 1H), 7.34–7.36 (m, 3H, ArH), 7.48–7.51 (m, 2H, ArH) ppm.

$^{13}\text{C-NMR}$  (100 MHz,  $\text{CDCl}_3$ )  $\delta$  -2.2, 15.8, 19.2, 20.5, 29.0, 29.7, 33.3, 33.4, 41.2, 42.0, 43.3, 43.3, 127.9, 129.0, 133.5, 135.2, 139.5, 145.4, 200.8 ppm.

$^{29}\text{Si-NMR}$  (99.3 MHz,  $\text{CDCl}_3$ )  $\delta$  -3.50 ppm.

HRESMS  $m/z$  309.1658 (calcd for  $\text{C}_{18}\text{H}_{26}\text{NaOSi}$ , 309.1651  $[\text{M} + \text{Na}]^+$ ).

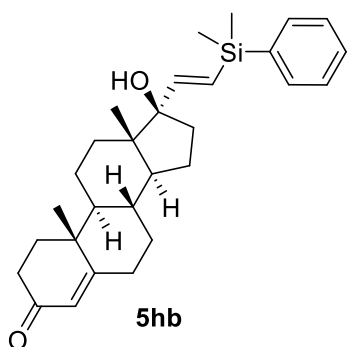

$^1\text{H-NMR}$  (400 MHz,  $\text{CDCl}_3$ )  $\delta$  0.36 (s, 6H), 0.82 (m, 1H), 0.96 (s, 3H), 1.01–1.17 (m, 2H), 0.96 (s, 3H), 1.19 (s, 3H), 1.24 (m, 2H), 1.35–1.56 (m, 4H), 1.59 (m, 2H), 1.65–1.69 (m, 3H), 1.81–1.88 (m, 2H), 1.95–2.0 (m, 2H), 2.05 (s, 1H), 2.25–2.44 (m, 3H), 5.73 (s, 1H), 5.86 (d, 1H), 6.24 (d, 1H), 7.31–7.37 (m, 3H, ArH), 7.49–7.52 (m, 2H, ArH) ppm.

$^{13}\text{C-NMR}$  (100 MHz,  $\text{CDCl}_3$ )  $\delta$  -2.3, 14.4, 17.5, 20.8, 23.9, 31.8, 32.3, 34.1, 35.9, 36.2, 36.4, 38.8, 46.7, 49.8, 53.9, 85.0, 124.0, 124.6, 127.9, 129.2, 133.9, 138.9, 152.3, 171.3, 199.7 ppm.

HRESMS  $m/z$  447.2714 (calcd for  $\text{C}_{29}\text{H}_{39}\text{O}_2\text{Si}$ , 447.2719  $[\text{M} - \text{H}]^-$ ).

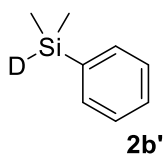

<sup>1</sup>H-NMR (400 MHz, CDCl<sub>3</sub>) δ 0.38 (s, 6H), 7.37–7.44 (m, 3H, ArH), 7.59–7.61 (m, 2H, ArH) ppm.<sup>21</sup>

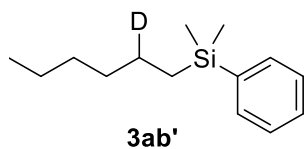

<sup>1</sup>H-NMR (400 MHz, CDCl<sub>3</sub>) δ 0.27 (s, 6H), 0.76 (d, 2H), 0.90 (m, 3H), 1.24–1.31 (m, 7H), 7.35–7.38 (m, 3H, ArH), 7.52 (m, 2H, ArH) ppm.

<sup>13</sup>C NMR (100 MHz, CDCl<sub>3</sub>) δ -3.0, 14.1, 15.6, 22.6, 23.3 (t), 31.5, 33.2, 127.7, 128.7, 133.6, 139.8 ppm.

<sup>2</sup>H-NMR (61 MHz, CHCl<sub>3</sub>) δ 1.27 ppm.

## 2. Copies of NMR spectra

<sup>1</sup>H-NMR

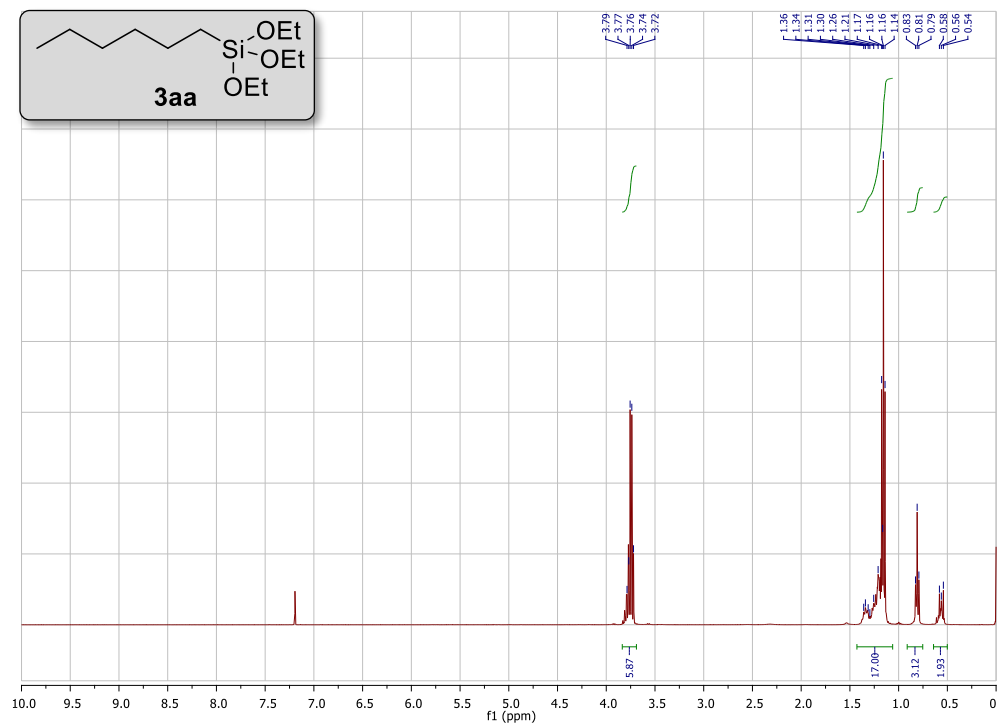

<sup>13</sup>C-NMR

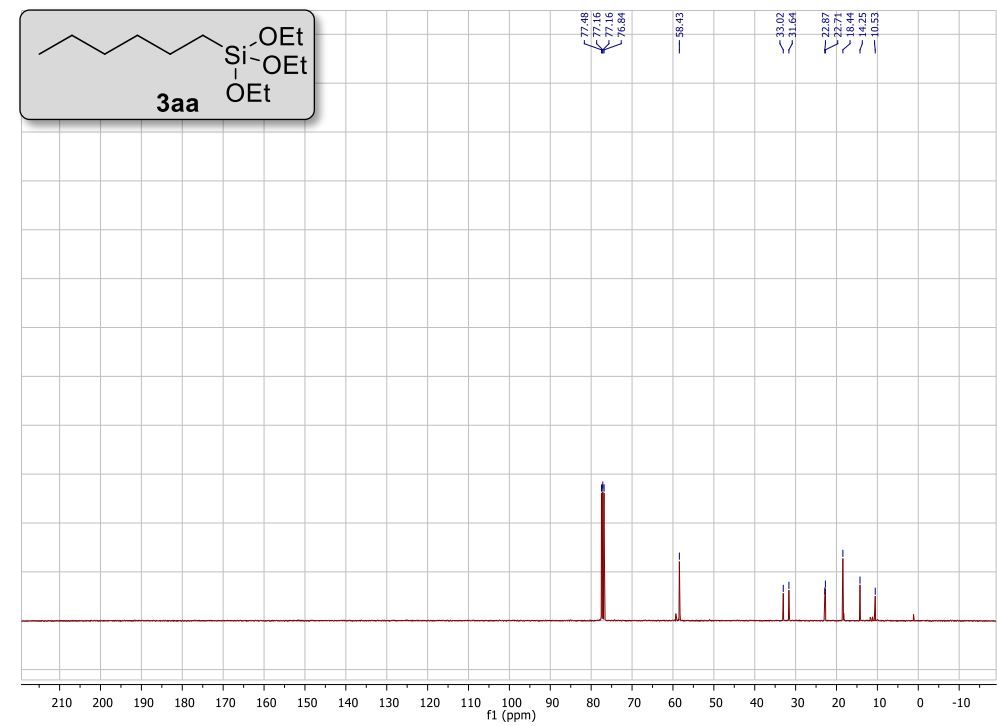



<sup>29</sup>Si-NMR

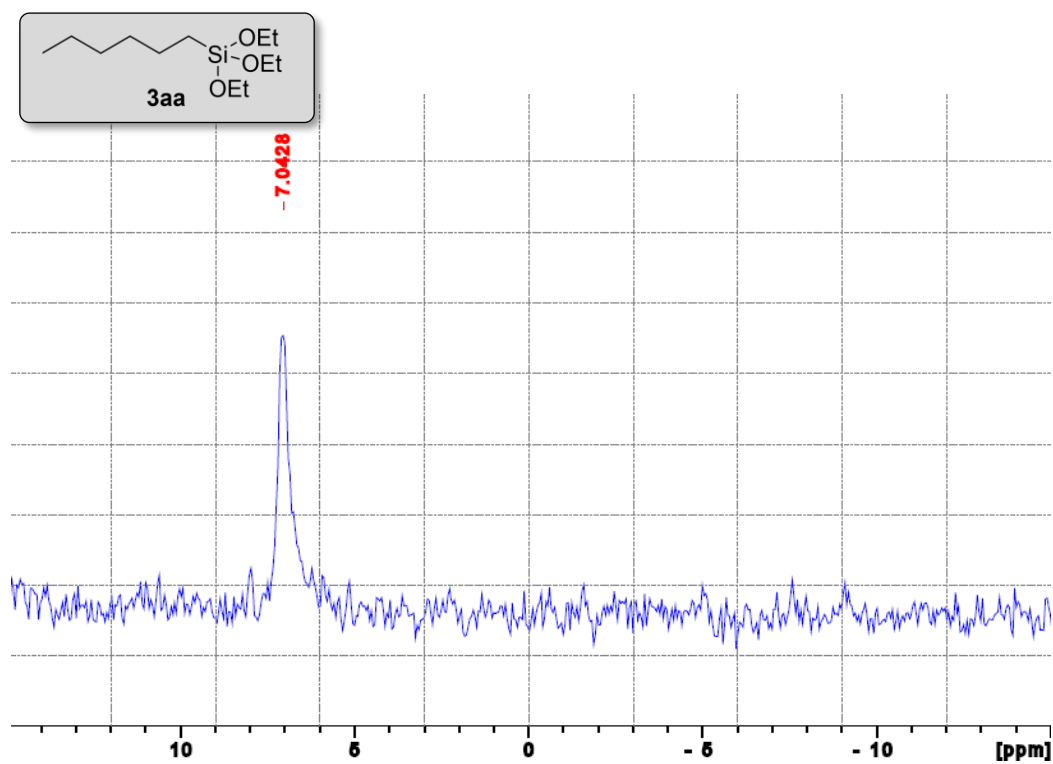

### <sup>1</sup>H-NMR

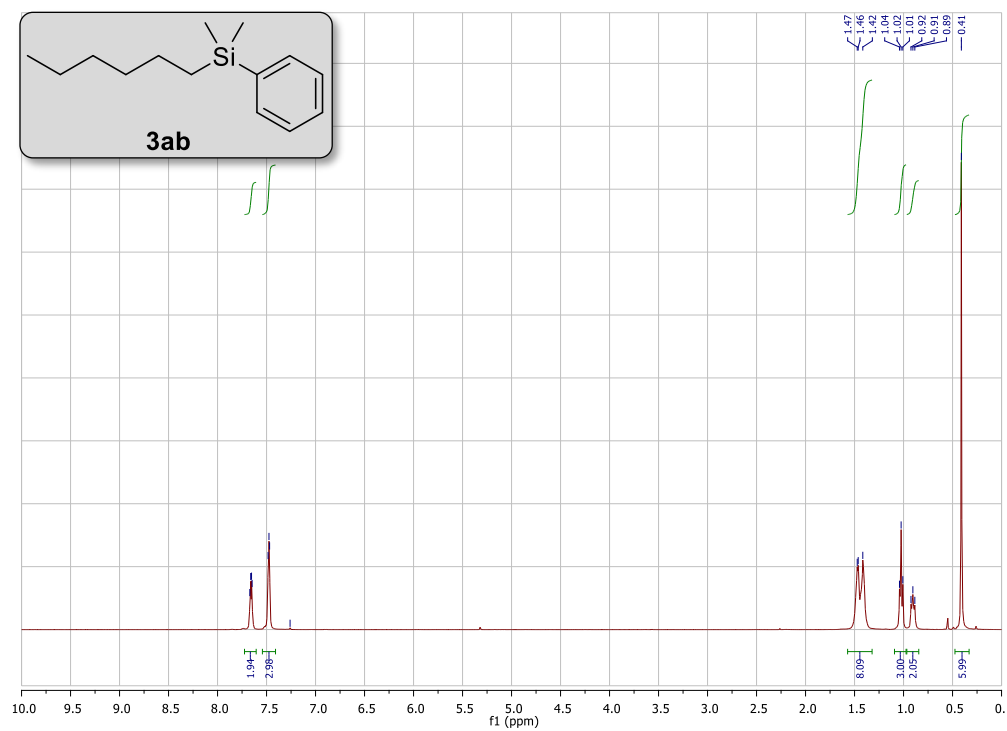

### <sup>13</sup>C-NMR

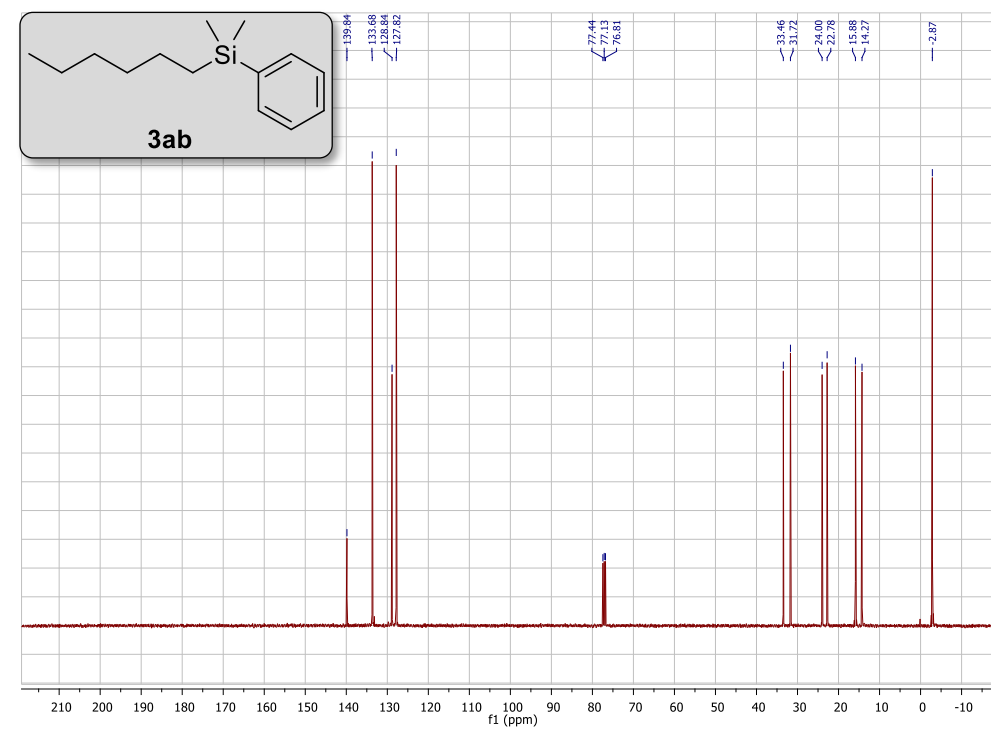

<sup>29</sup>Si-NMR

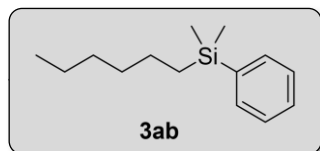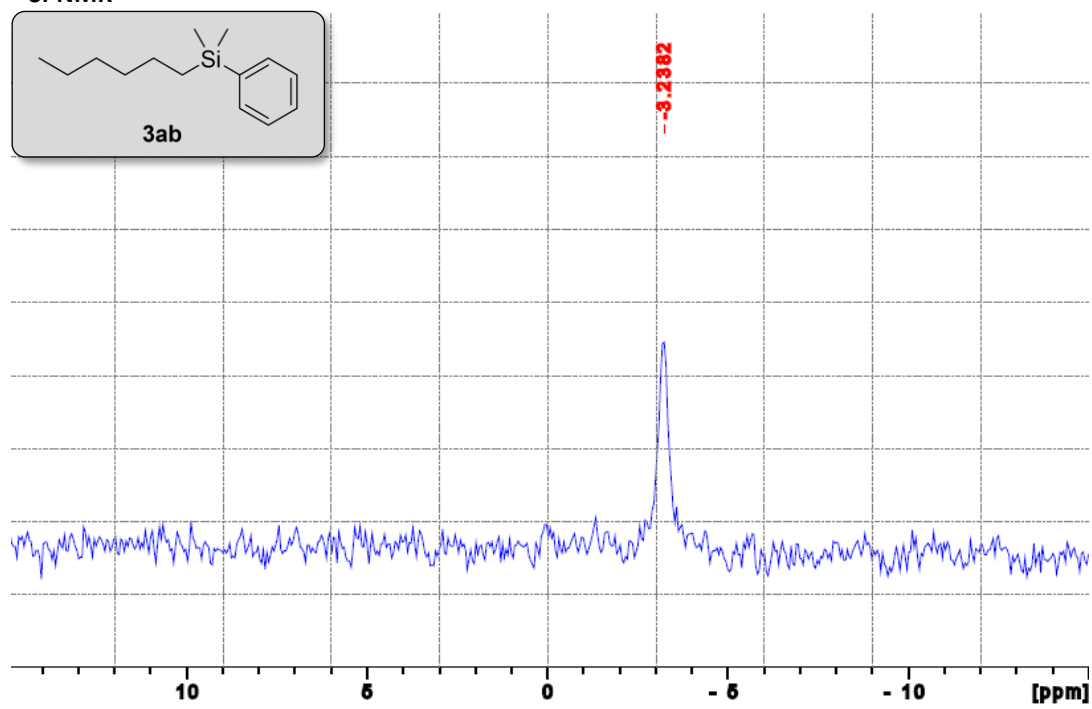

### <sup>1</sup>H-NMR

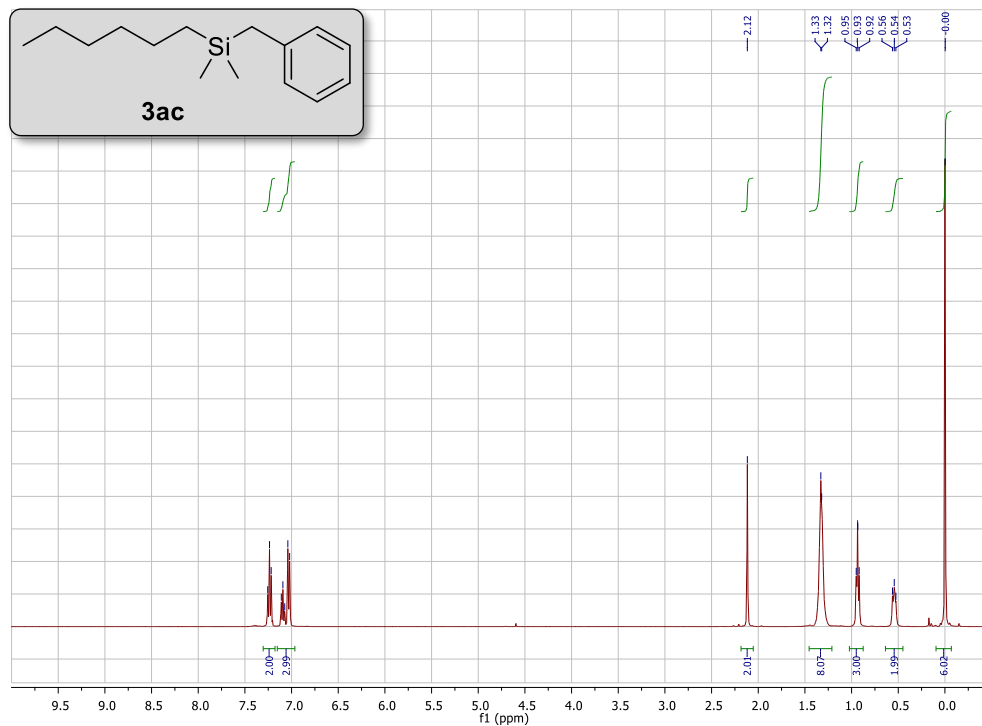

### <sup>13</sup>C-NMR

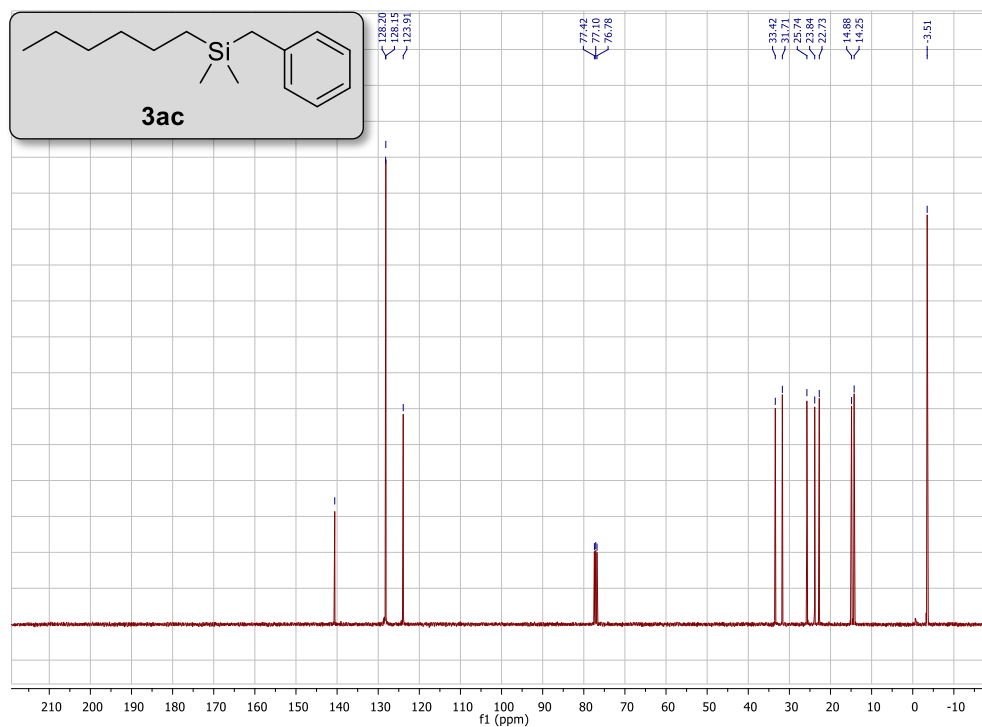

### <sup>1</sup>H-NMR

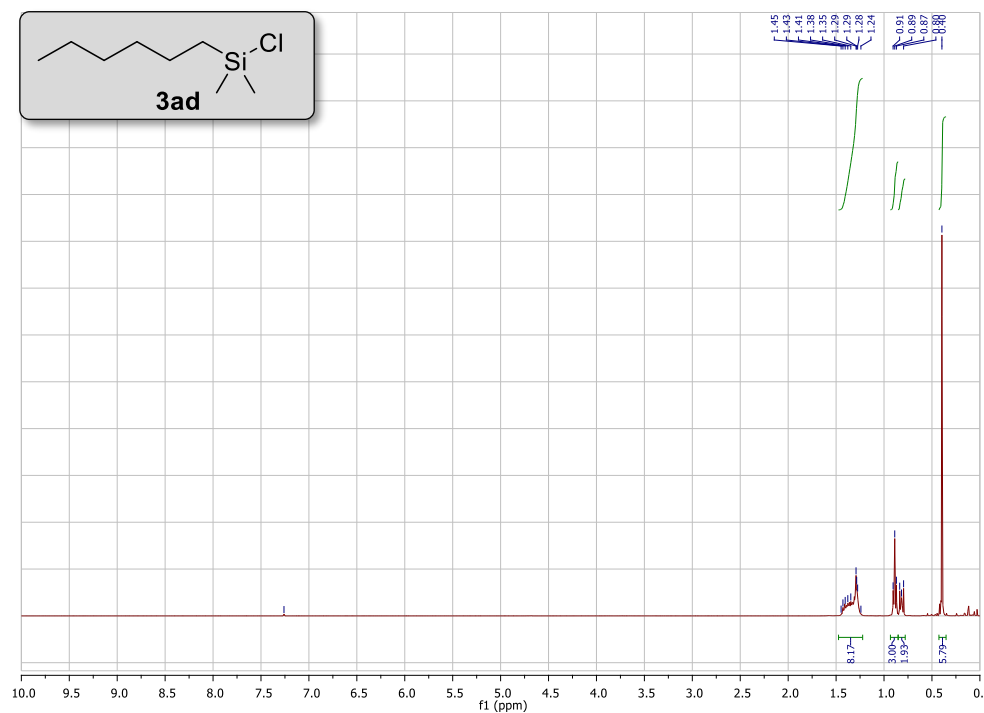

### <sup>13</sup>C-NMR

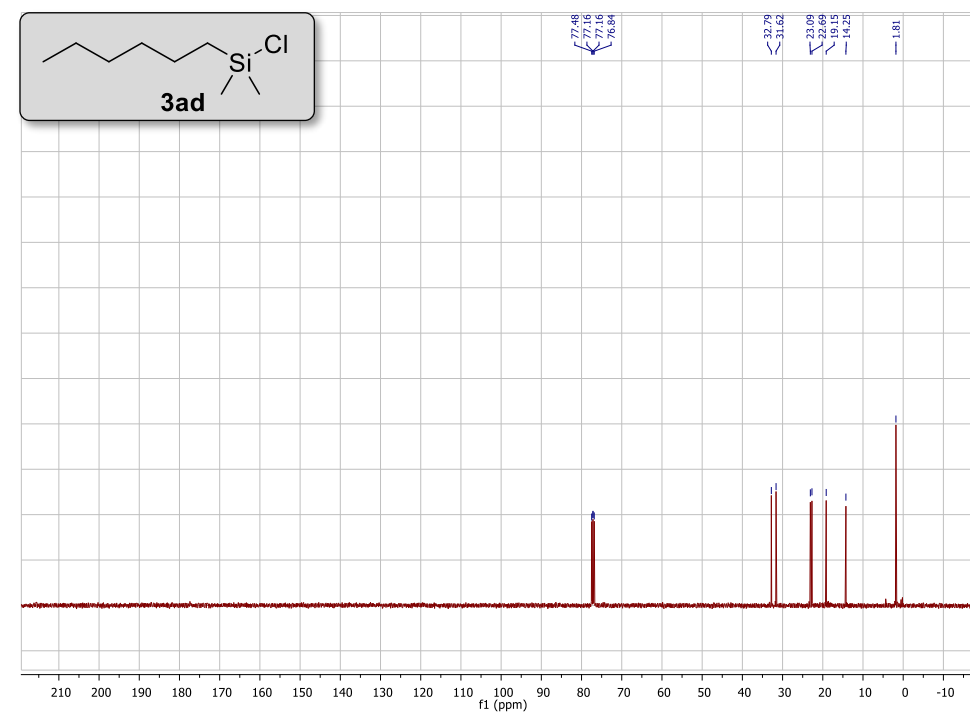

### <sup>1</sup>H-NMR

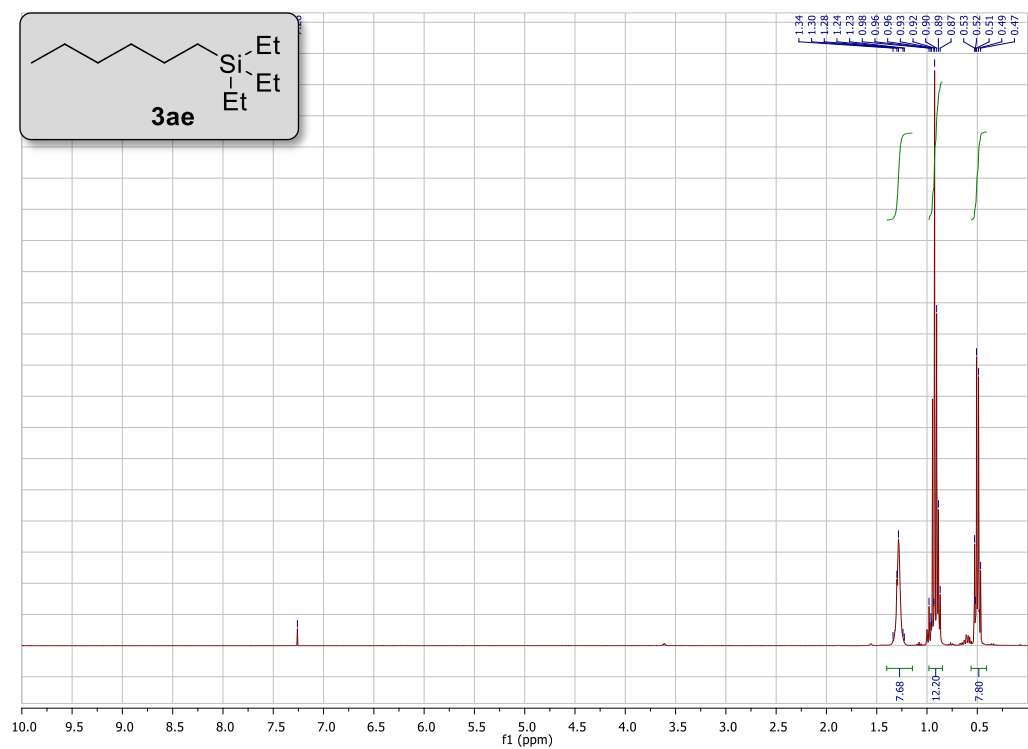

### <sup>13</sup>C-NMR

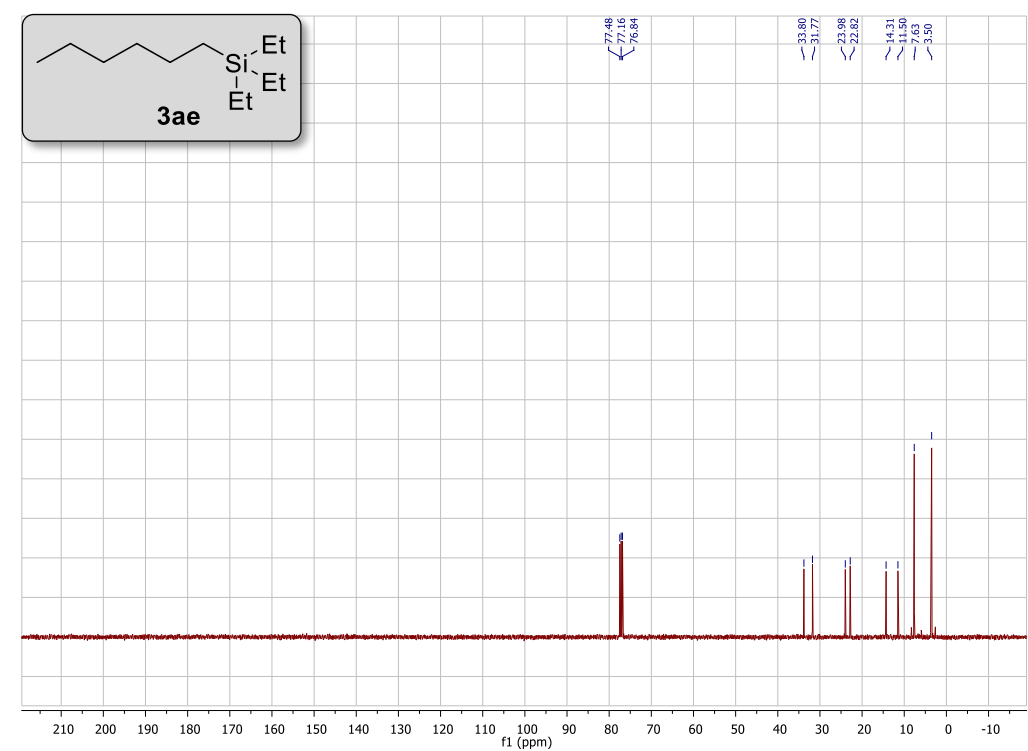

### <sup>1</sup>H-NMR

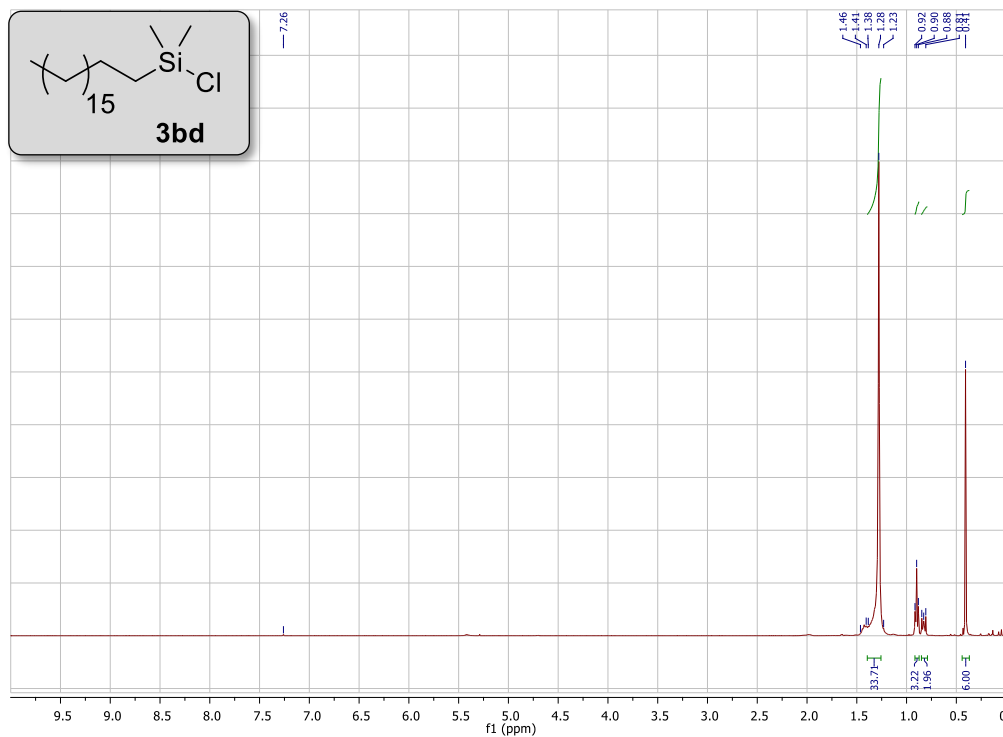

### <sup>13</sup>C-NMR

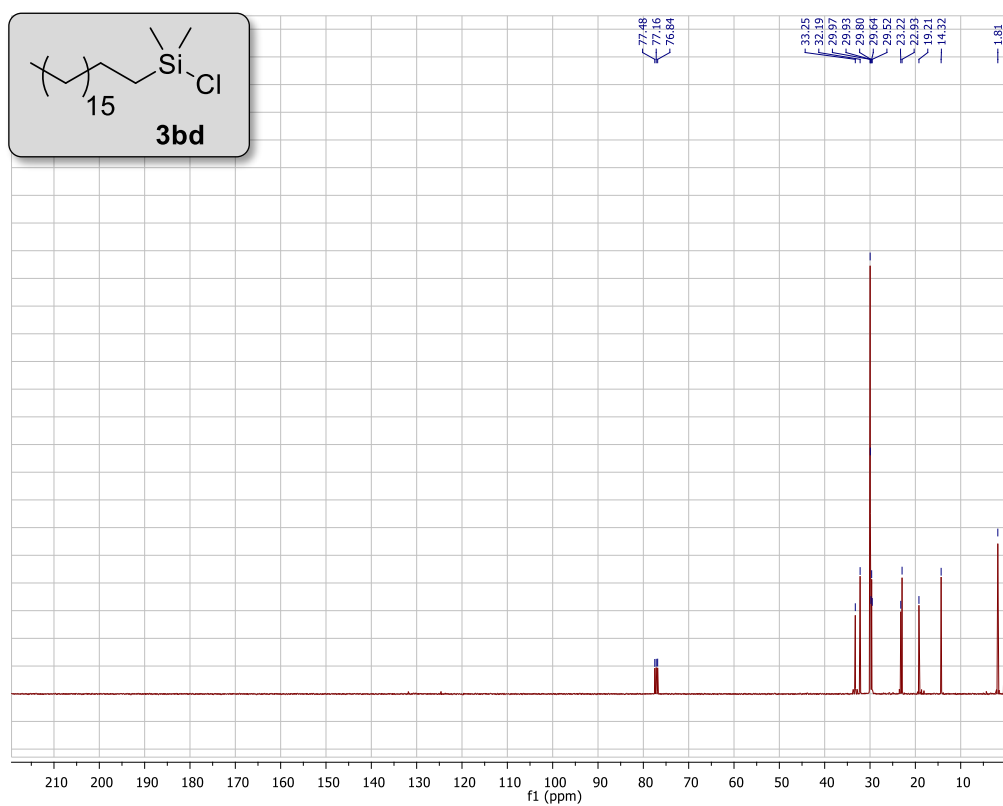

### <sup>1</sup>H-NMR

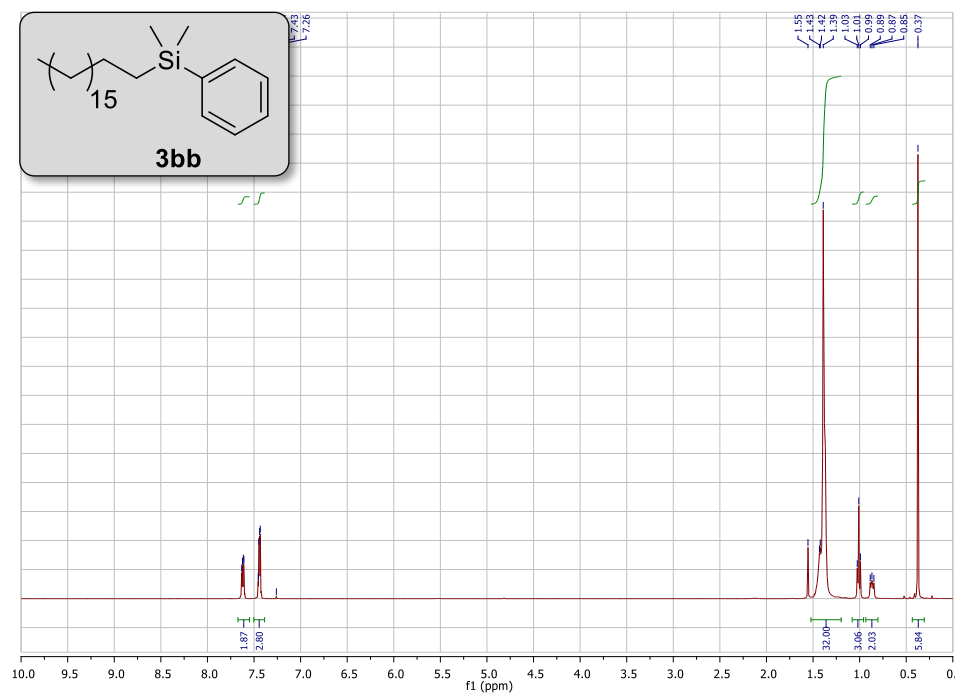

### <sup>13</sup>C-NMR

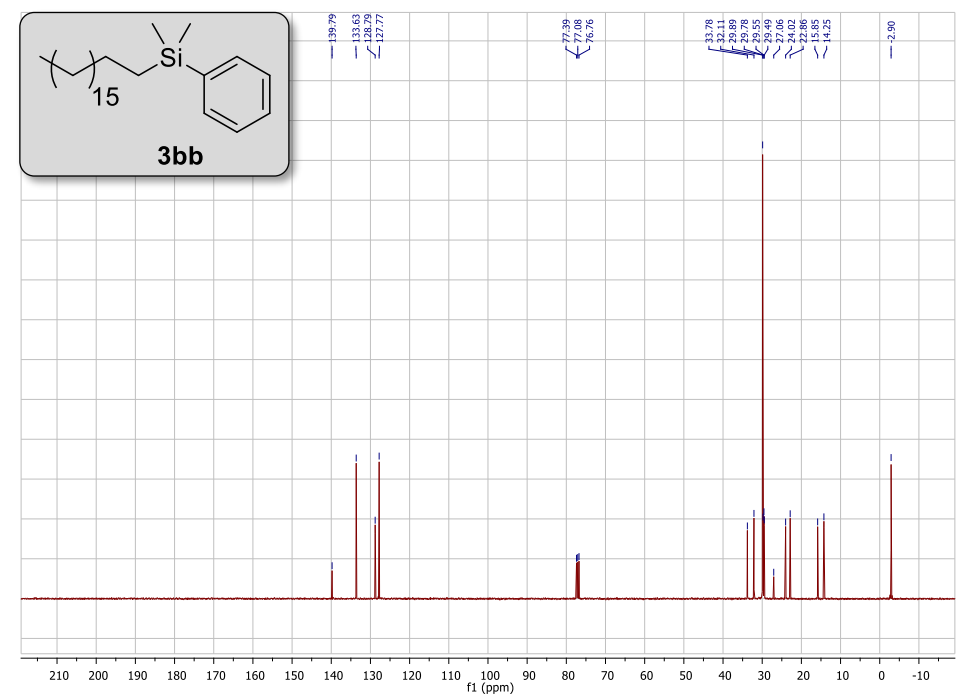



### <sup>1</sup>H-NMR

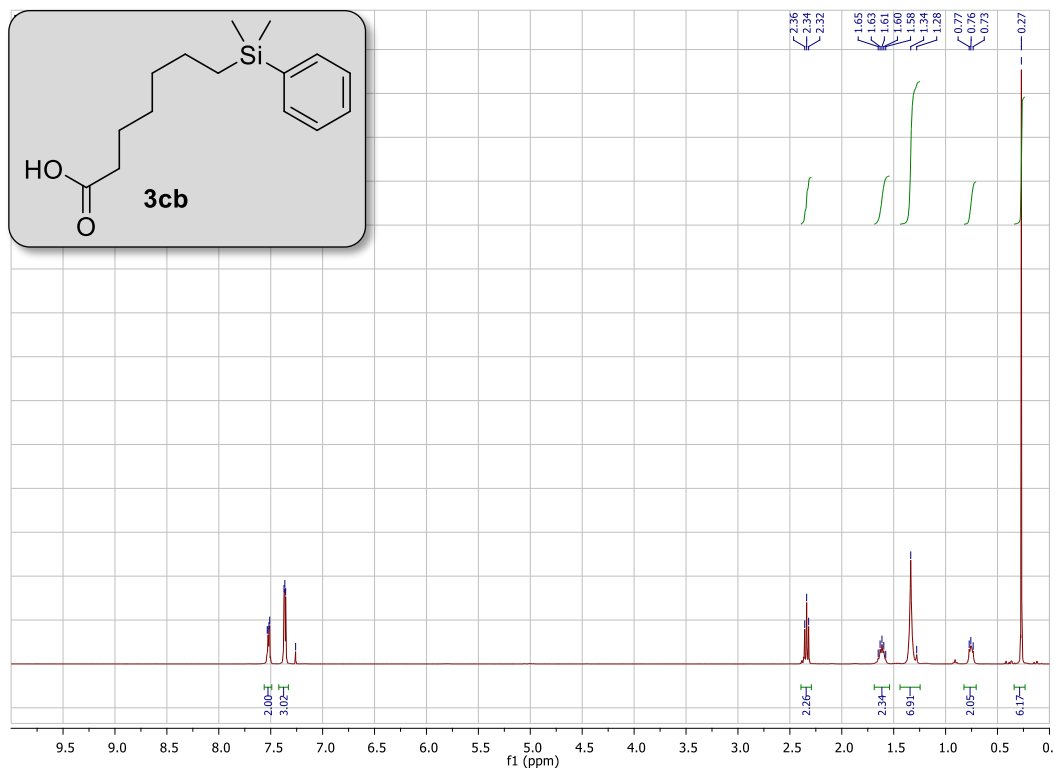

### <sup>13</sup>C-NMR

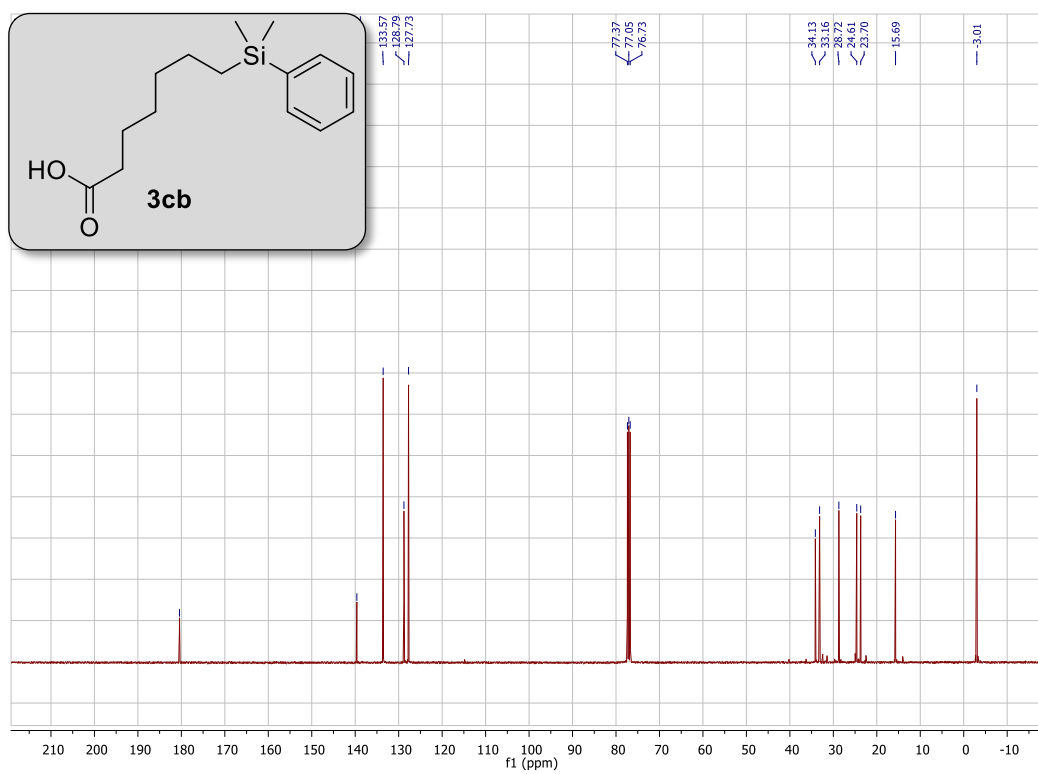

### <sup>1</sup>H-NMR

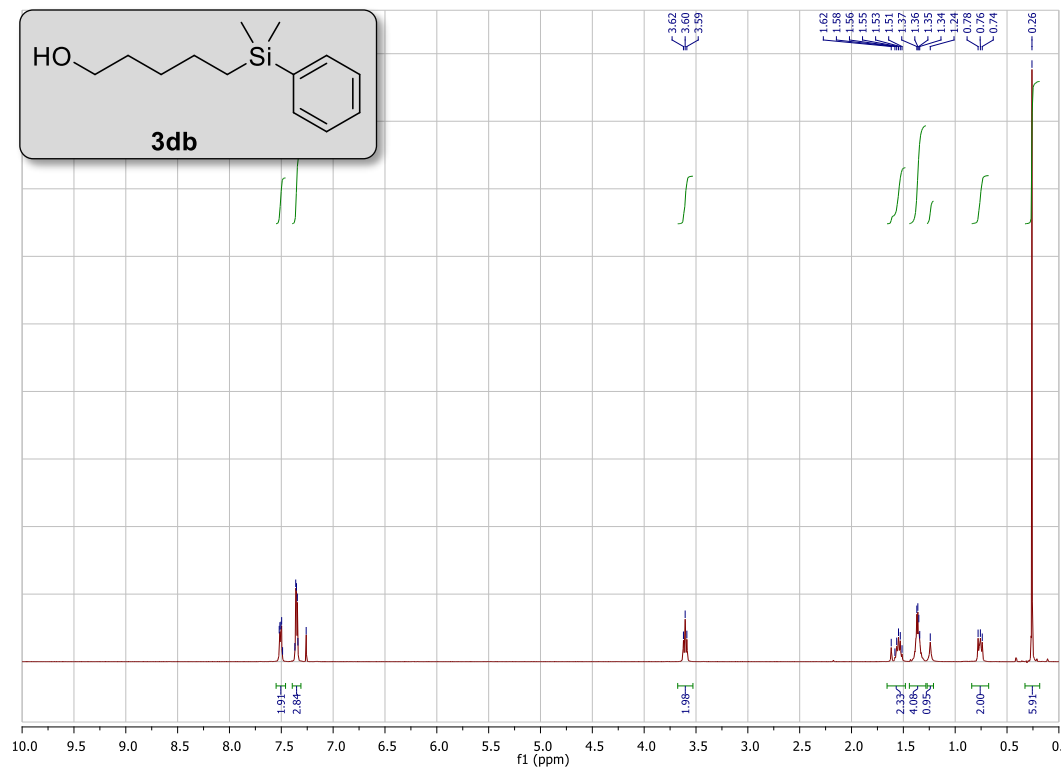

### <sup>13</sup>C-NMR

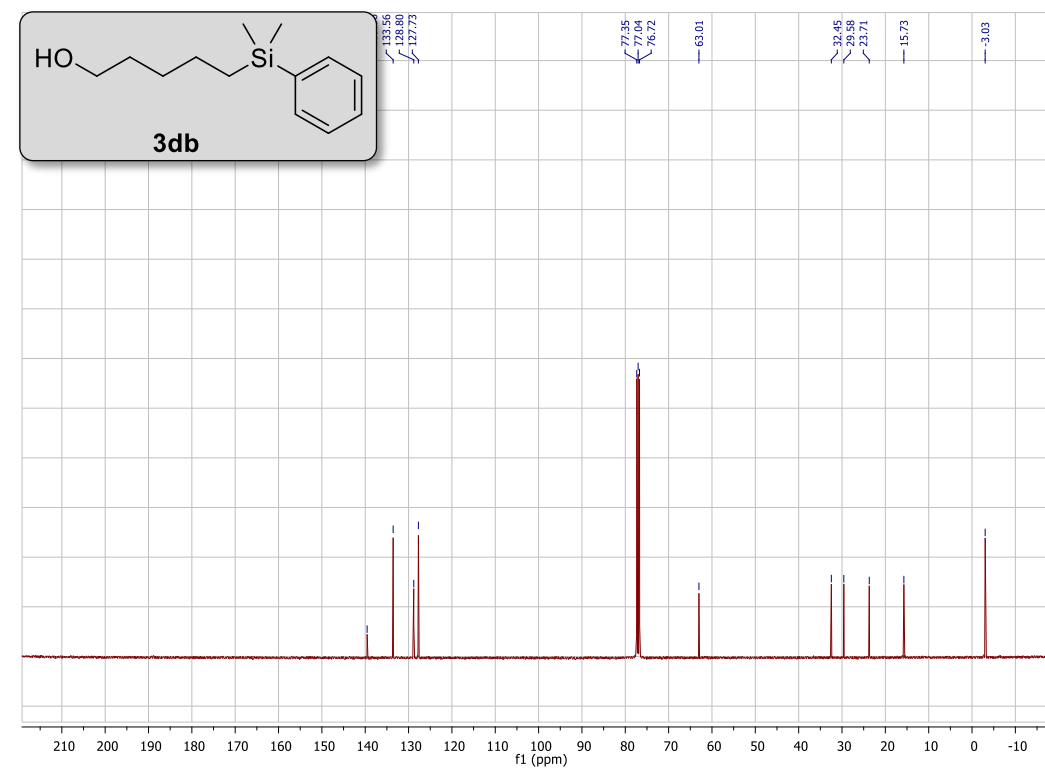

### <sup>1</sup>H-NMR

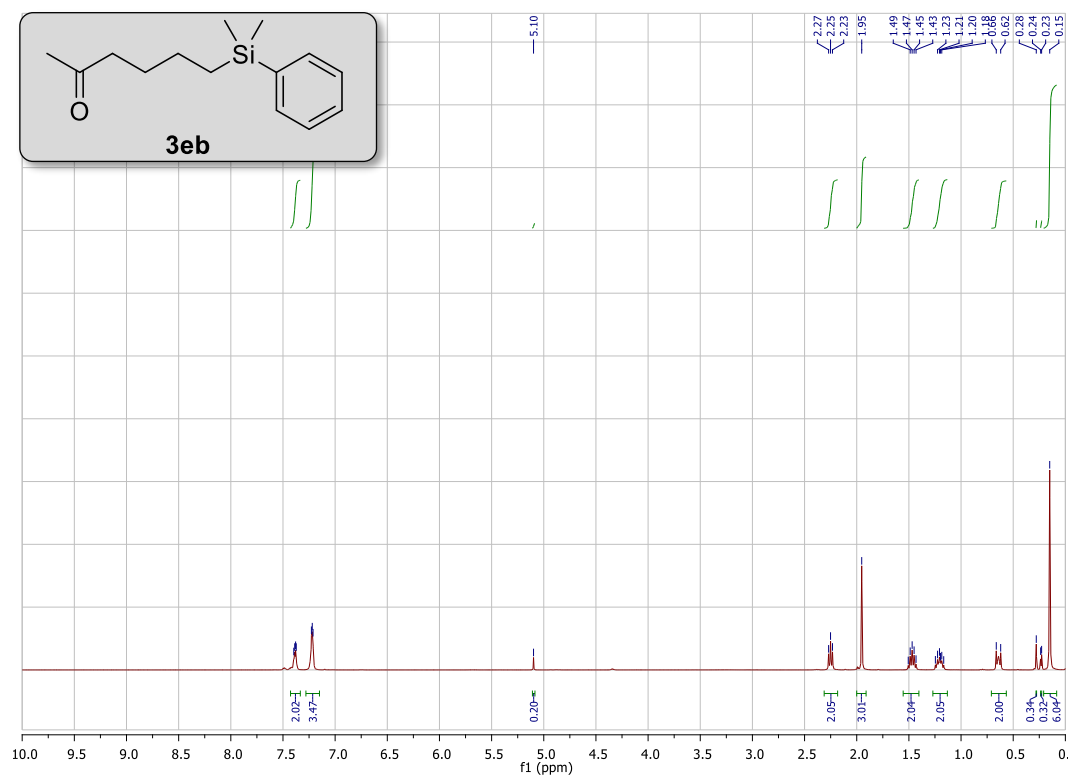

### <sup>13</sup>C-NMR

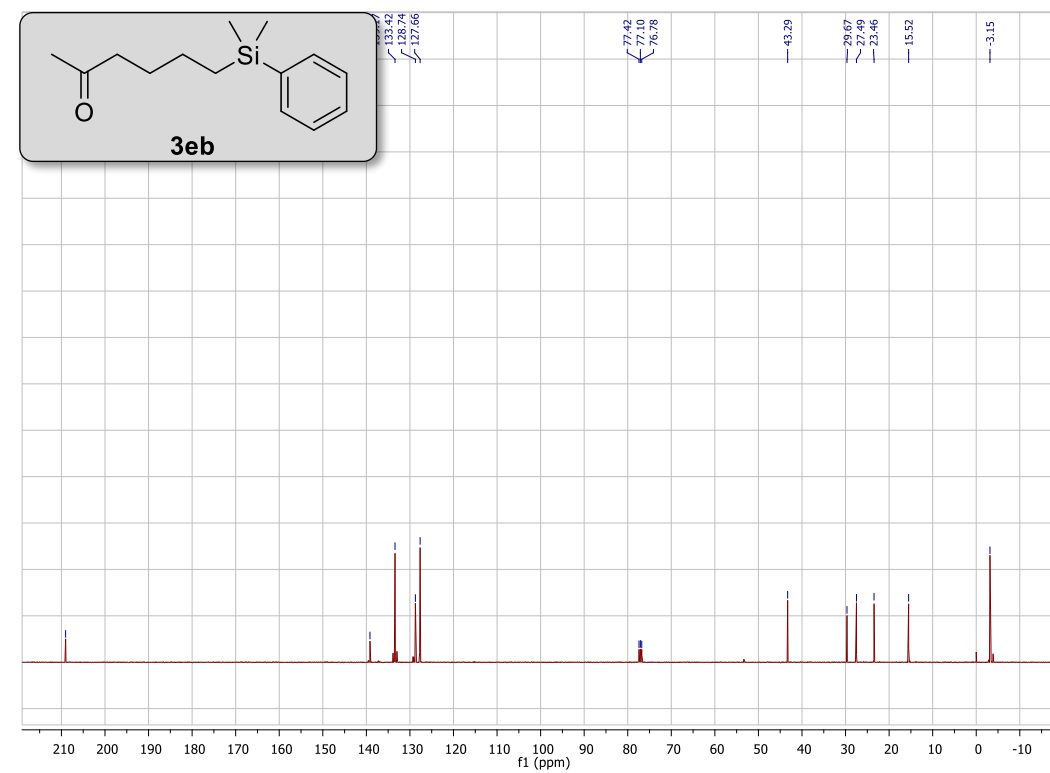

### <sup>1</sup>H-NMR

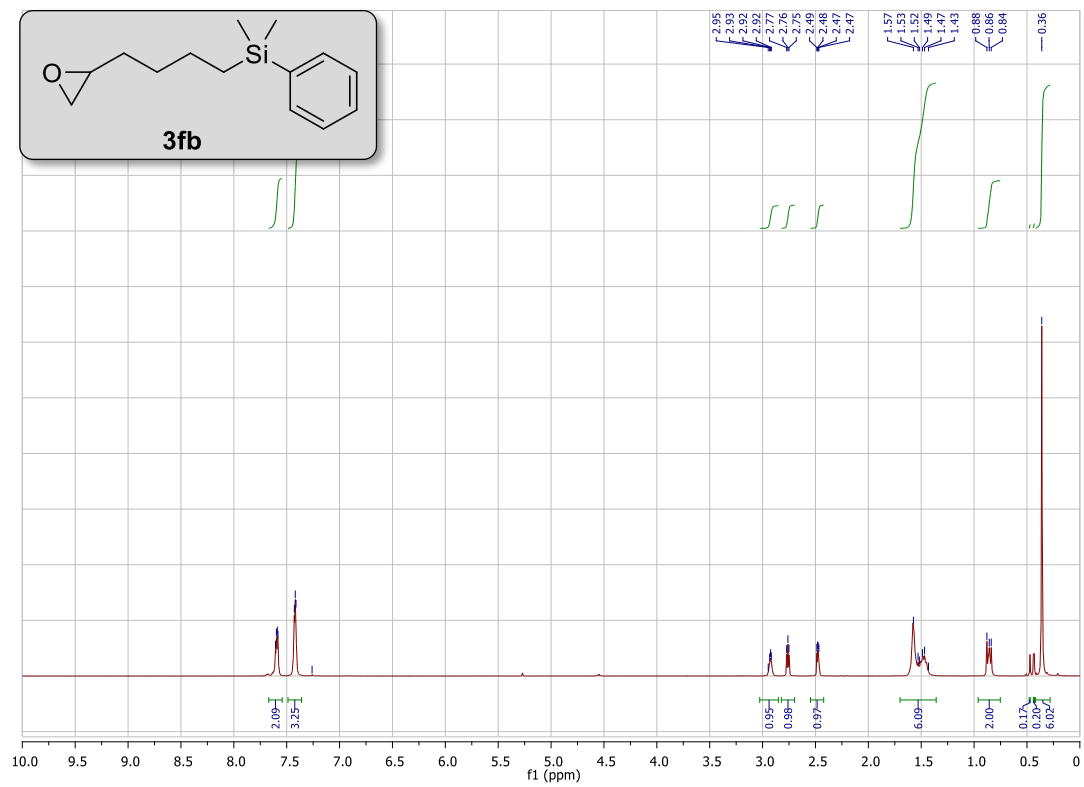

### <sup>13</sup>C-NMR

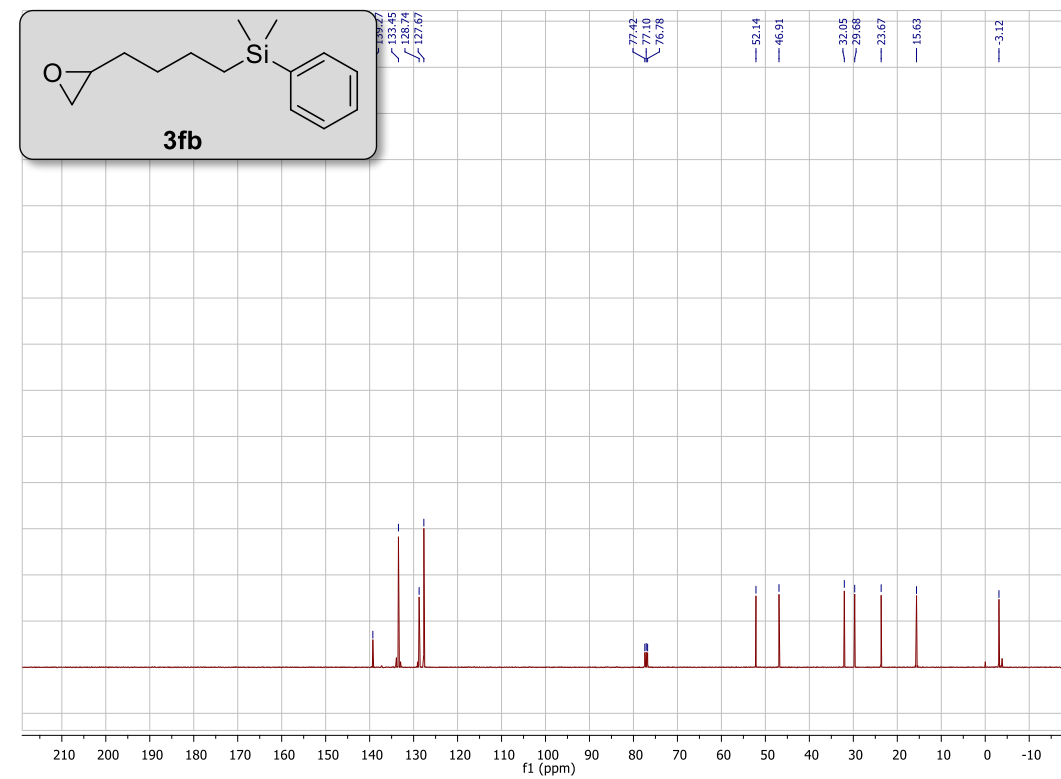

### <sup>1</sup>H-NMR

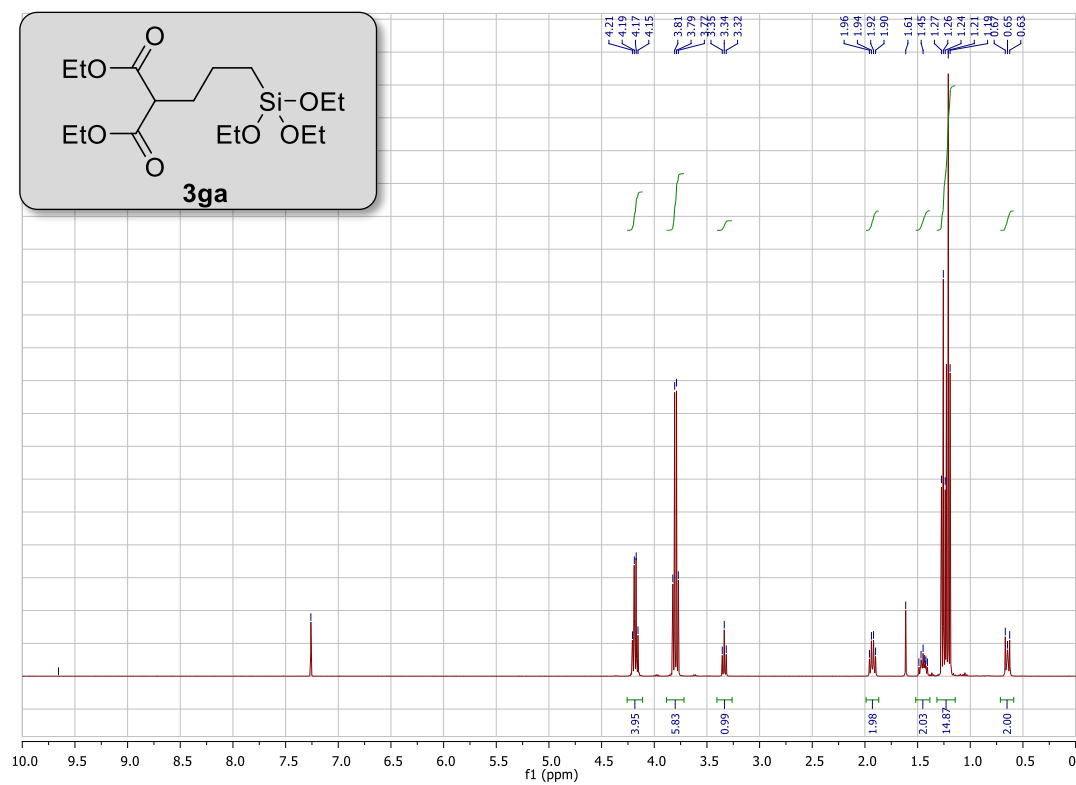

### <sup>13</sup>C-NMR

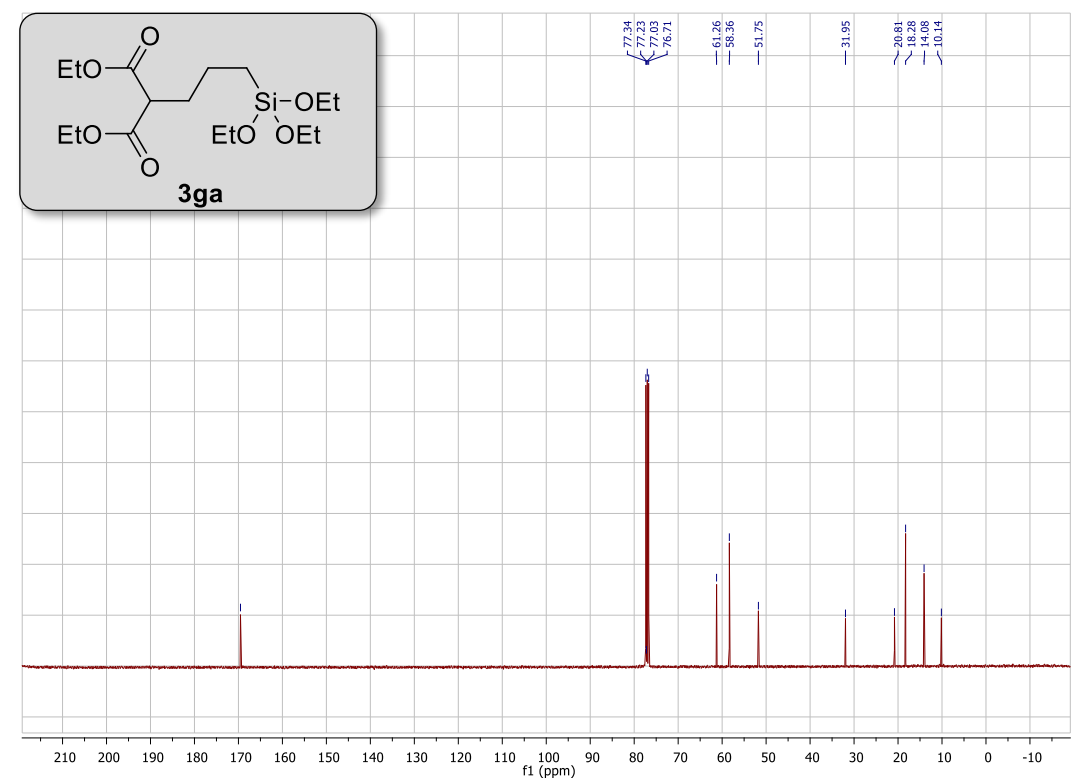

### <sup>1</sup>H-NMR

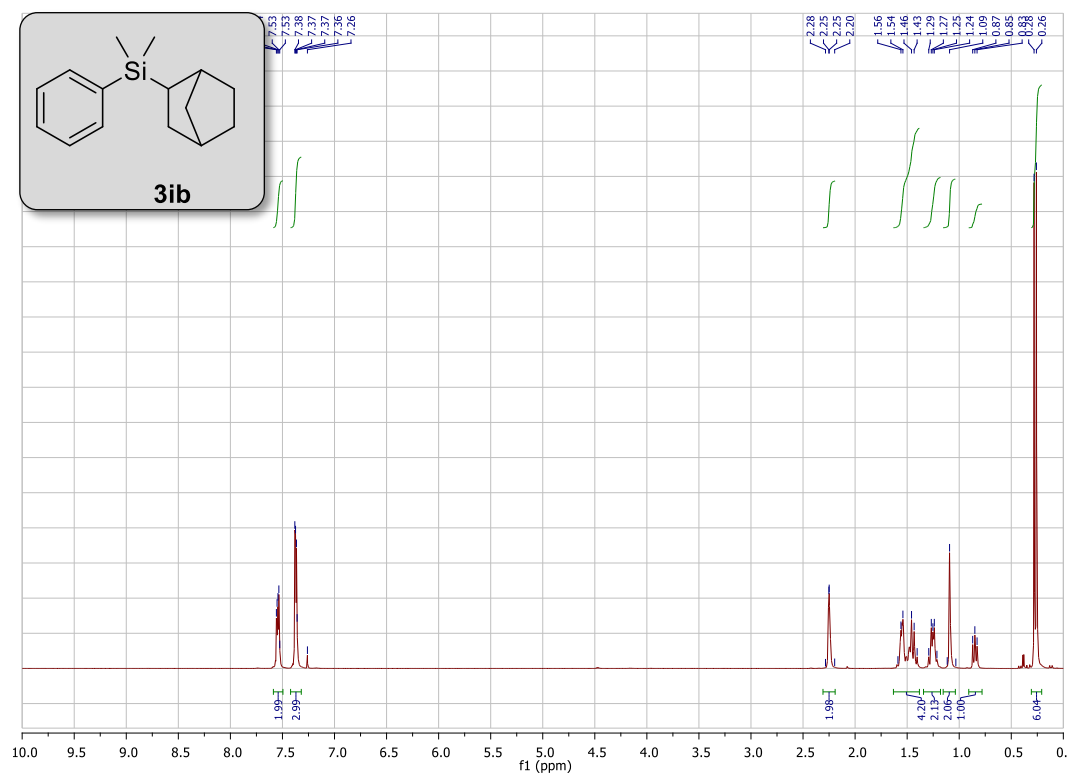

### <sup>13</sup>C-NMR

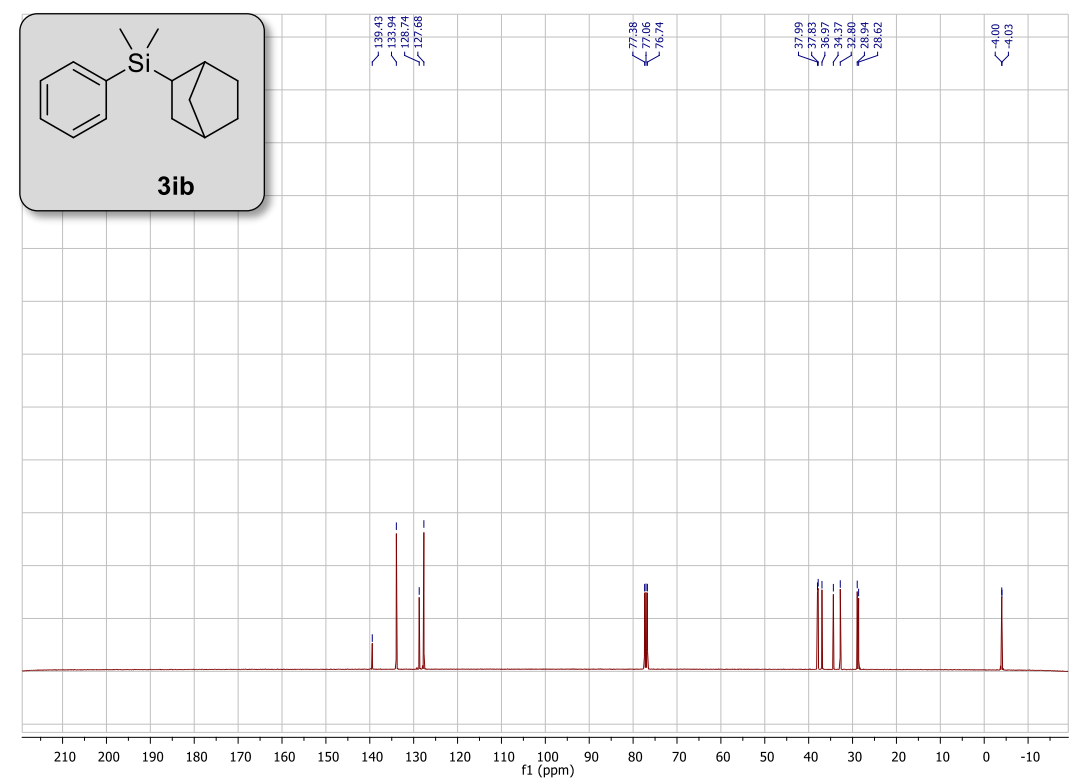

<sup>29</sup>Si-NMR

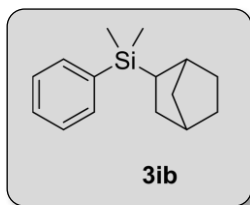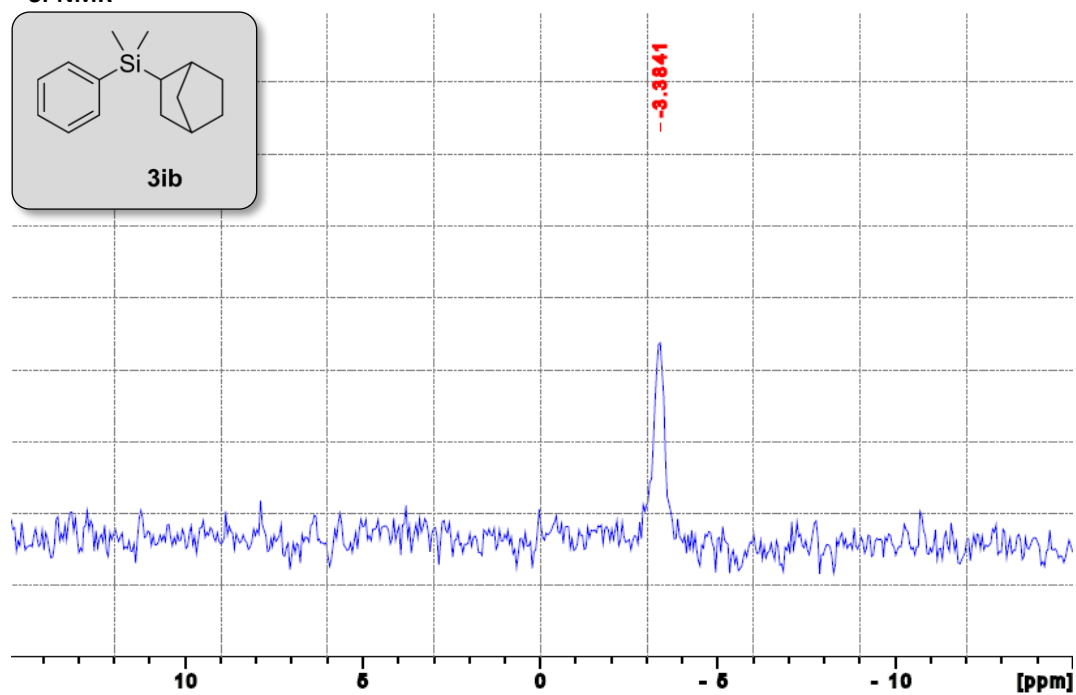

### <sup>1</sup>H-NMR

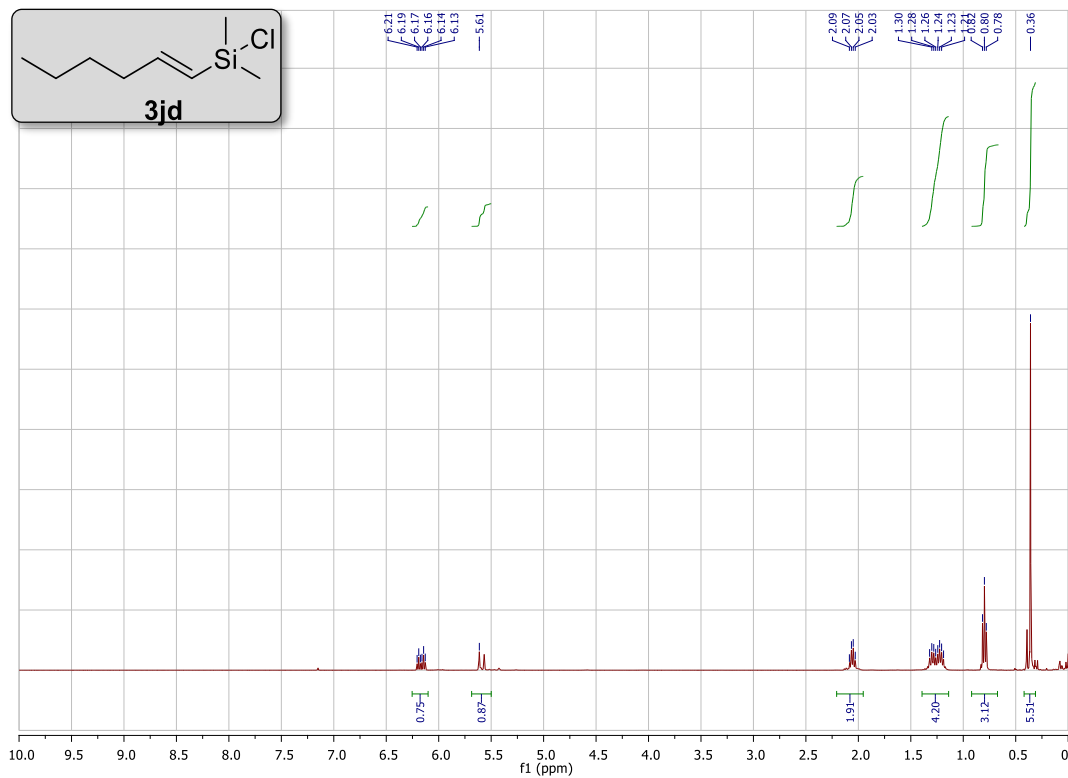

### <sup>13</sup>C-NMR

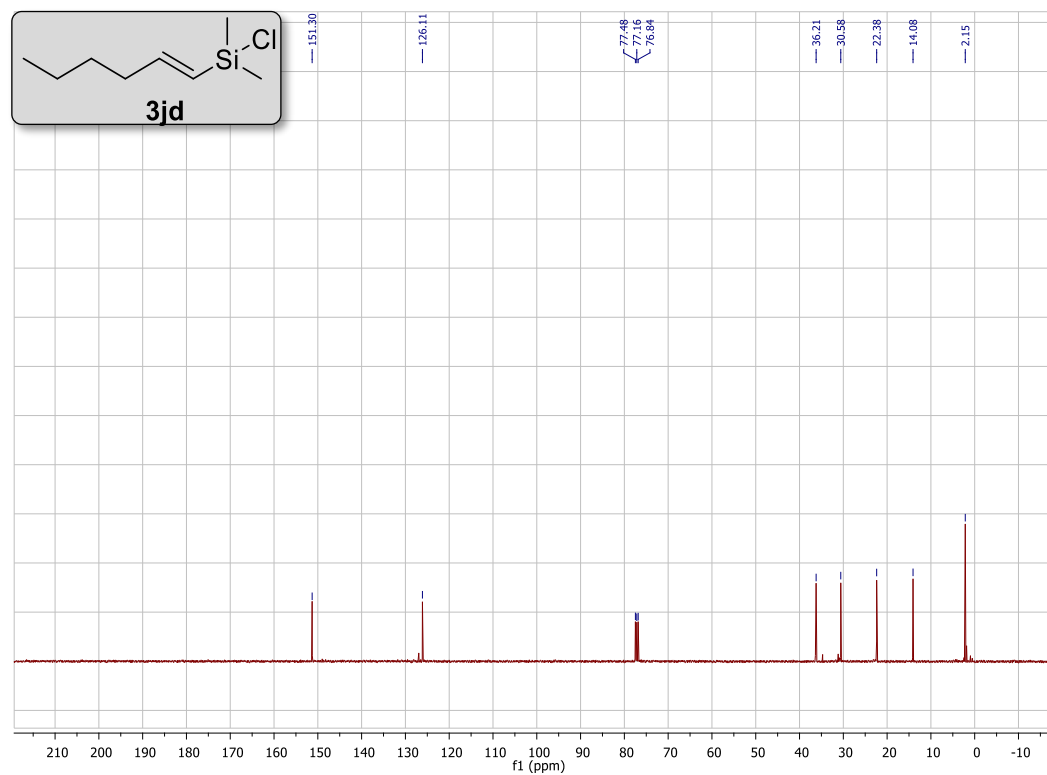



### <sup>1</sup>H-NMR

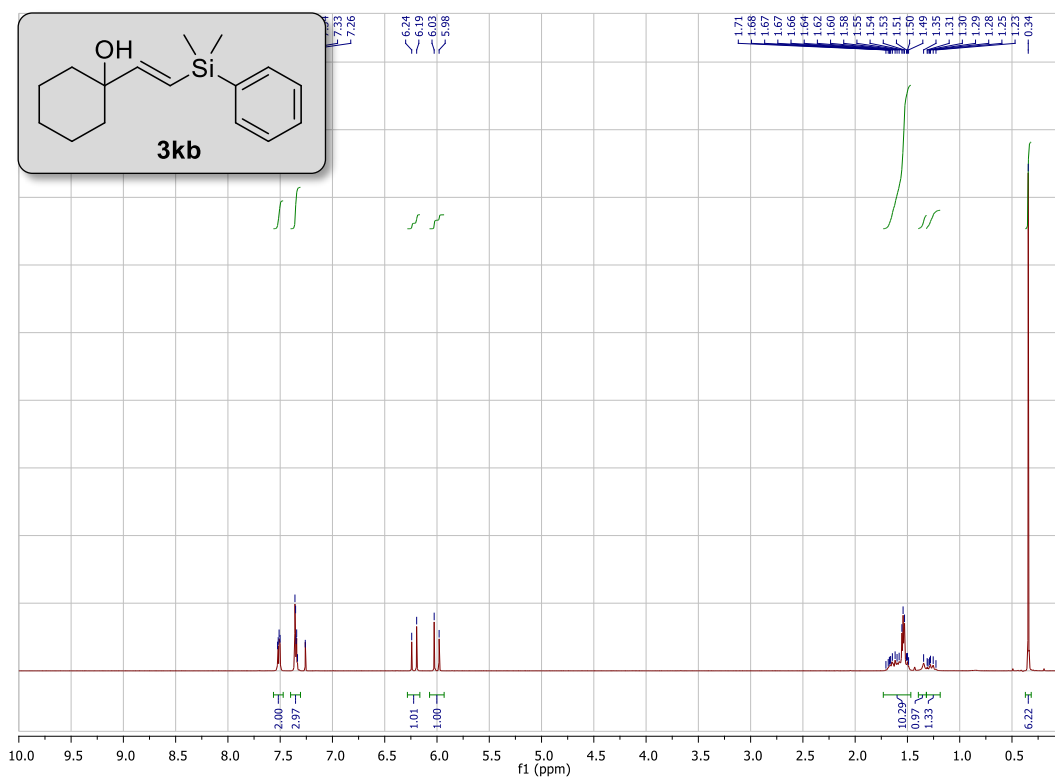

### <sup>13</sup>C-NMR

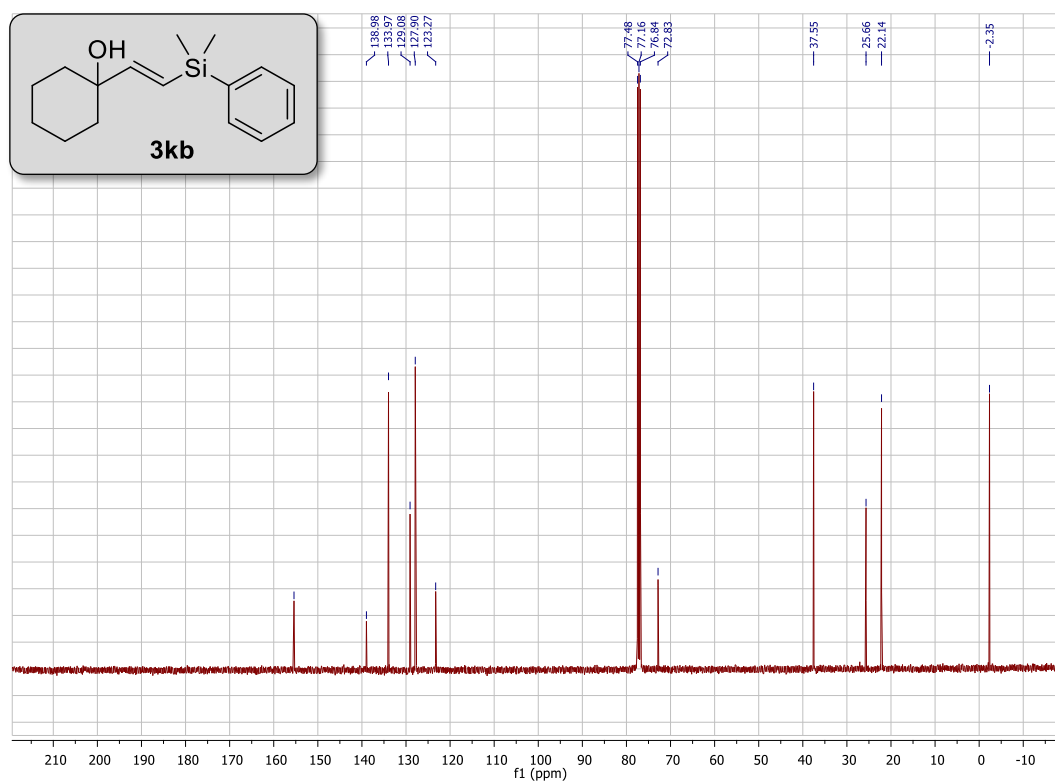

### <sup>1</sup>H-NMR

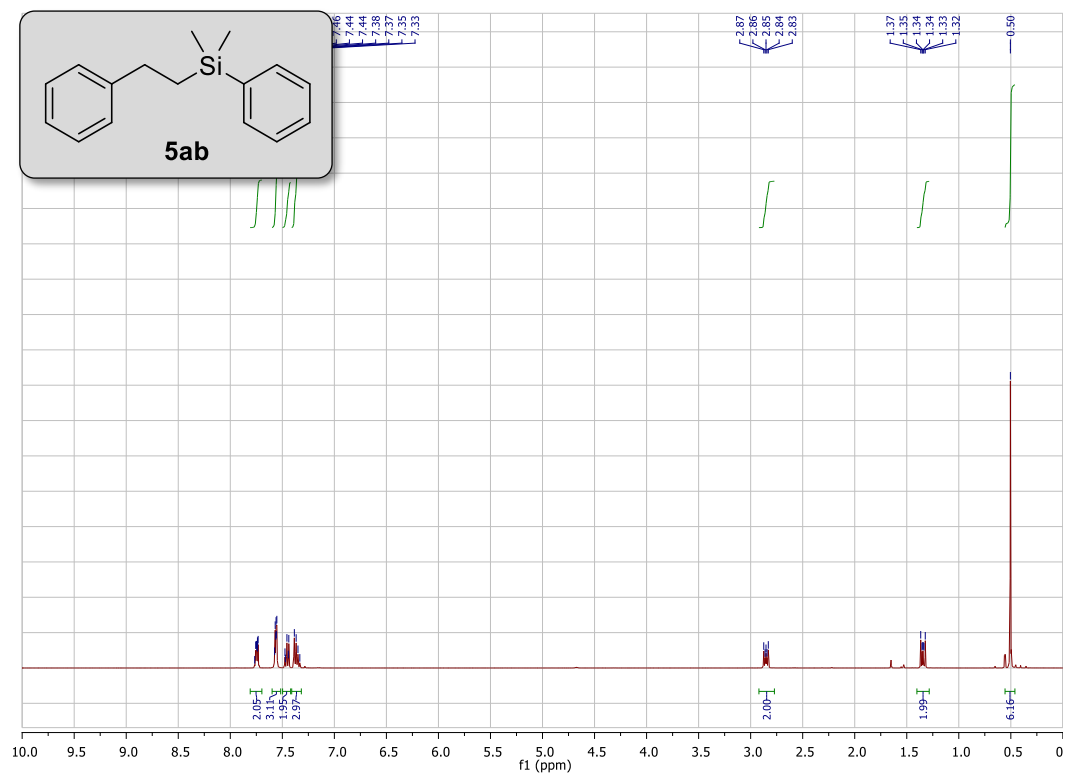

### <sup>13</sup>C-NMR

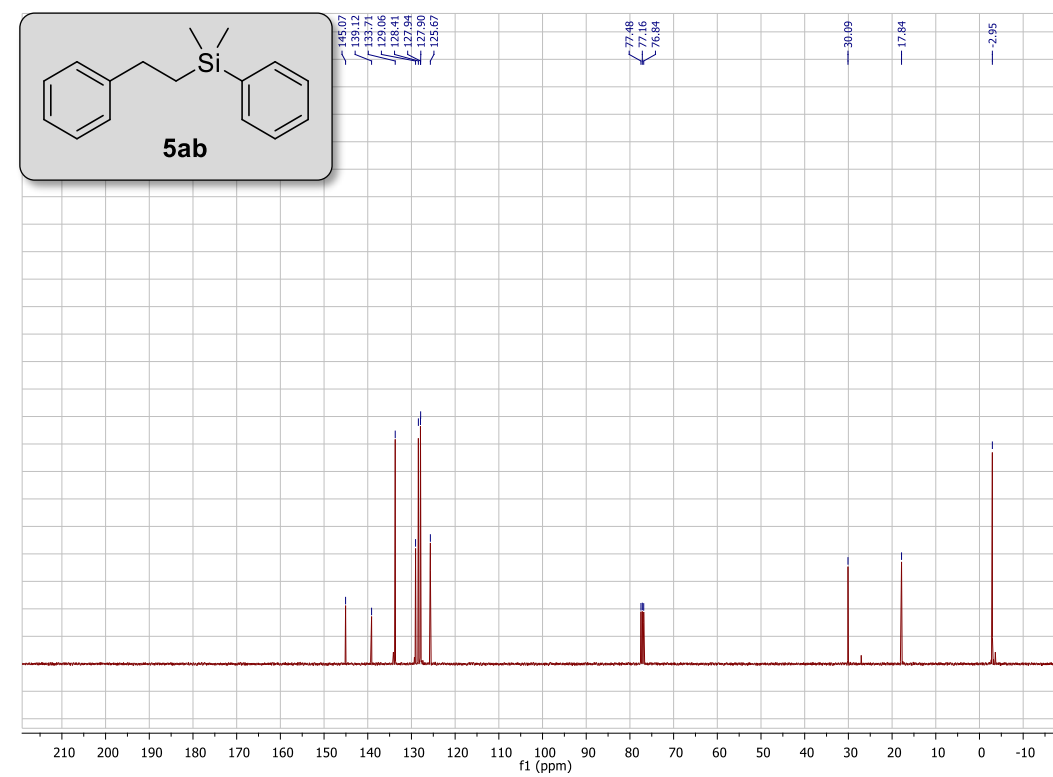

### <sup>1</sup>H-NMR

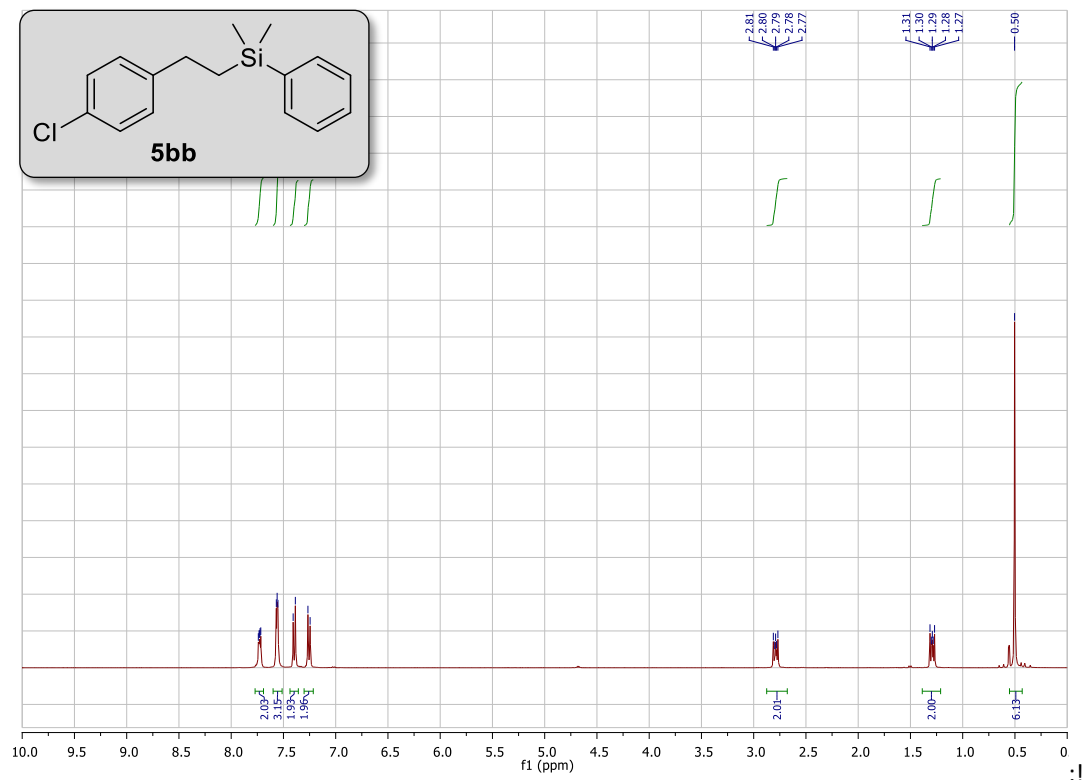

### <sup>13</sup>C-NMR

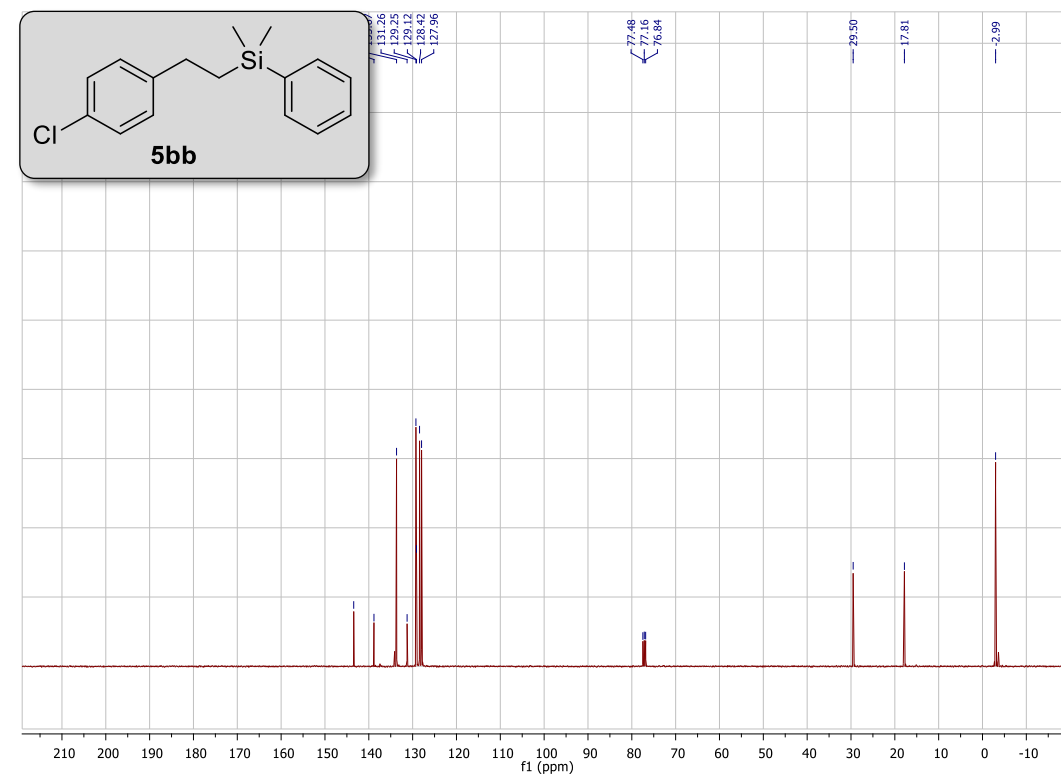

### <sup>1</sup>H-NMR

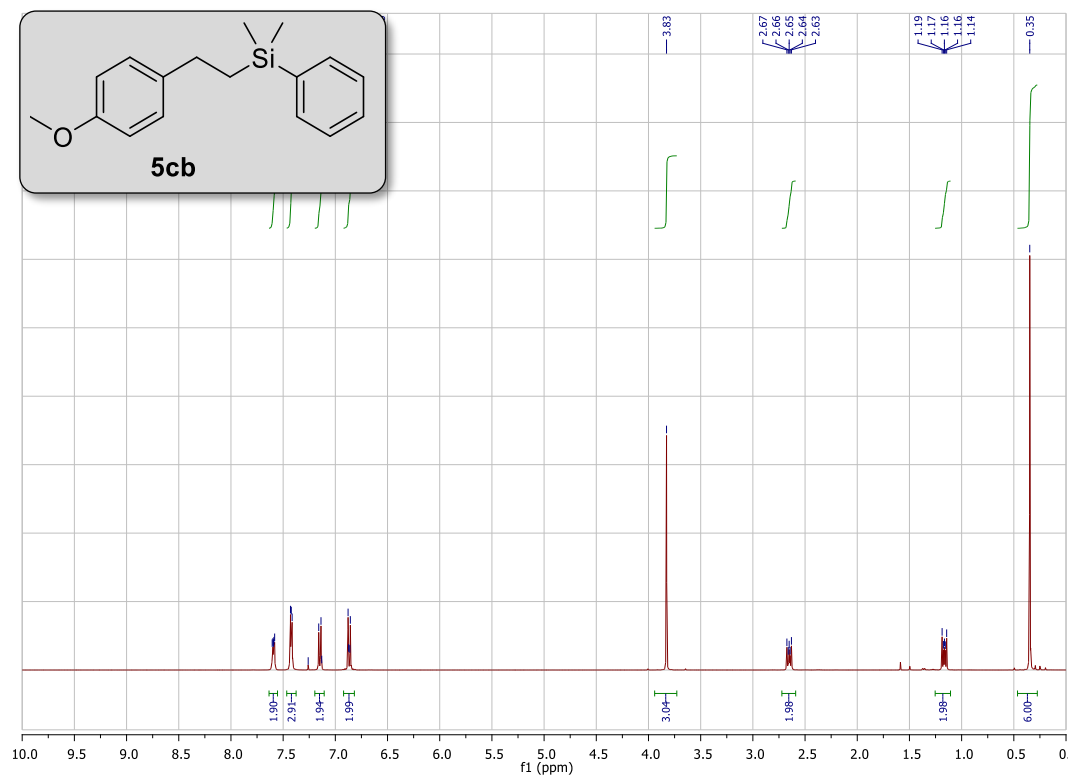

### <sup>13</sup>C-NMR

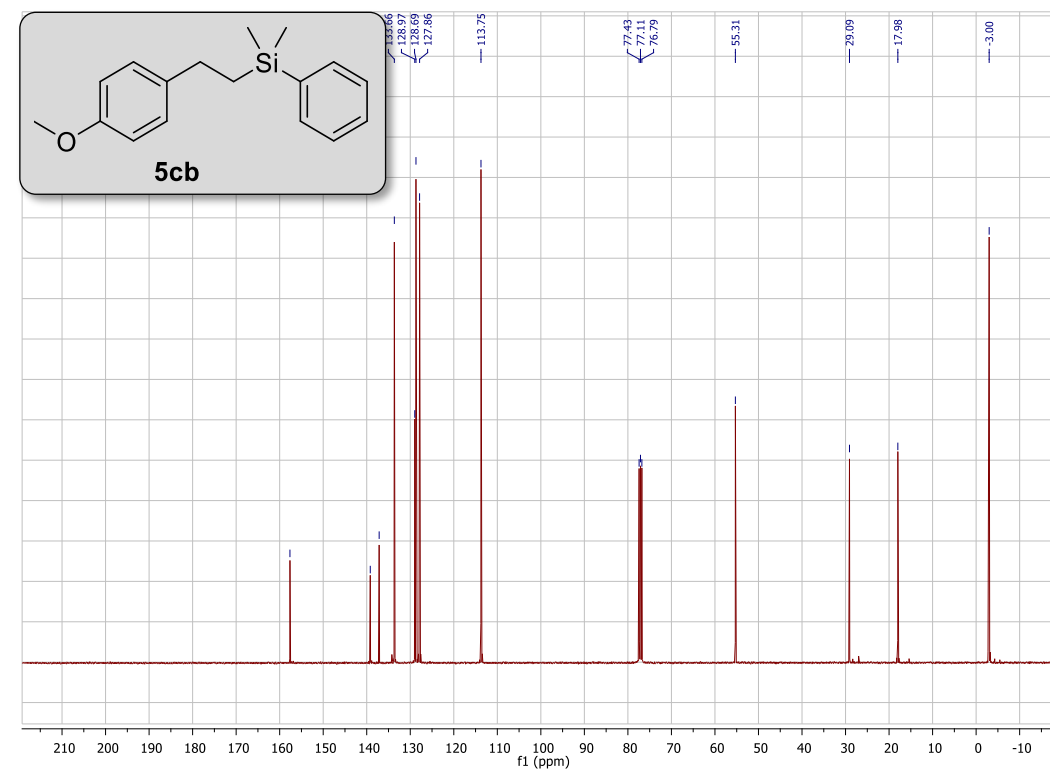

### <sup>1</sup>H-NMR

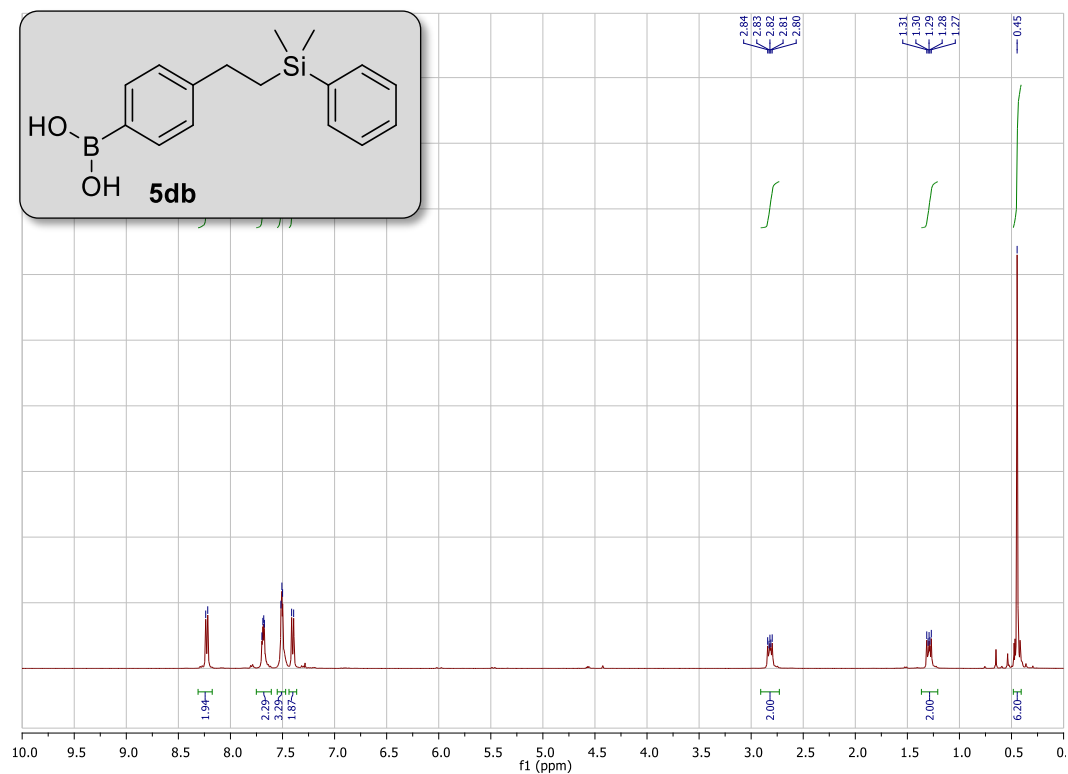

### <sup>13</sup>C-NMR

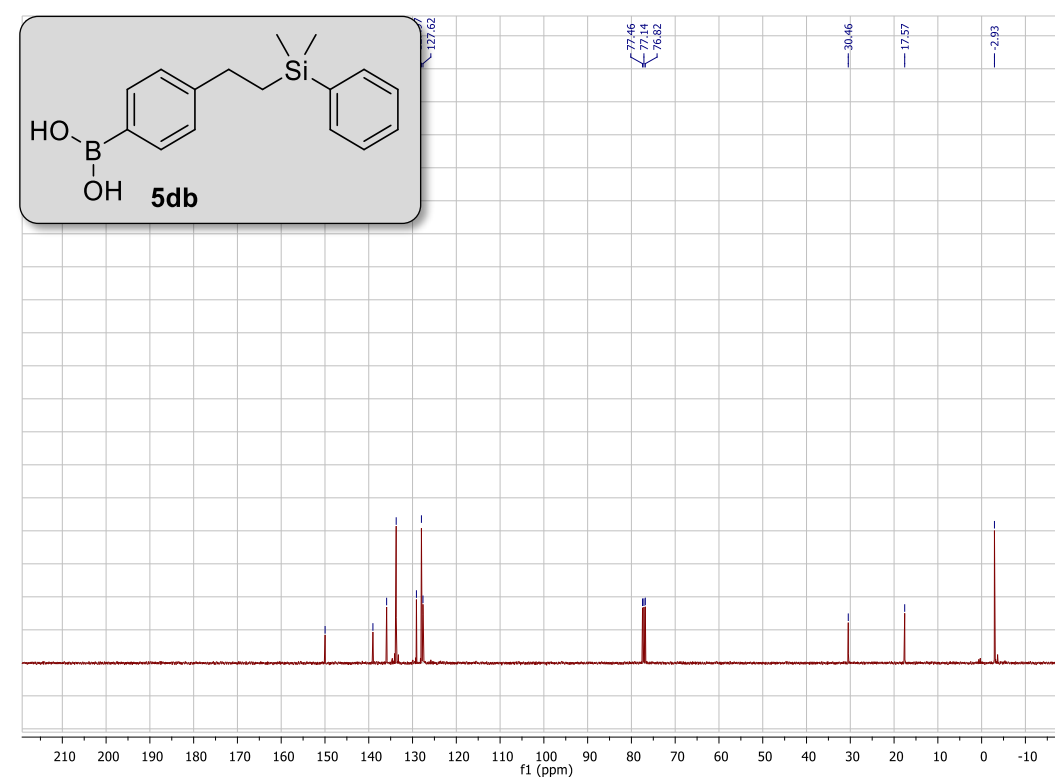

### <sup>1</sup>H-NMR

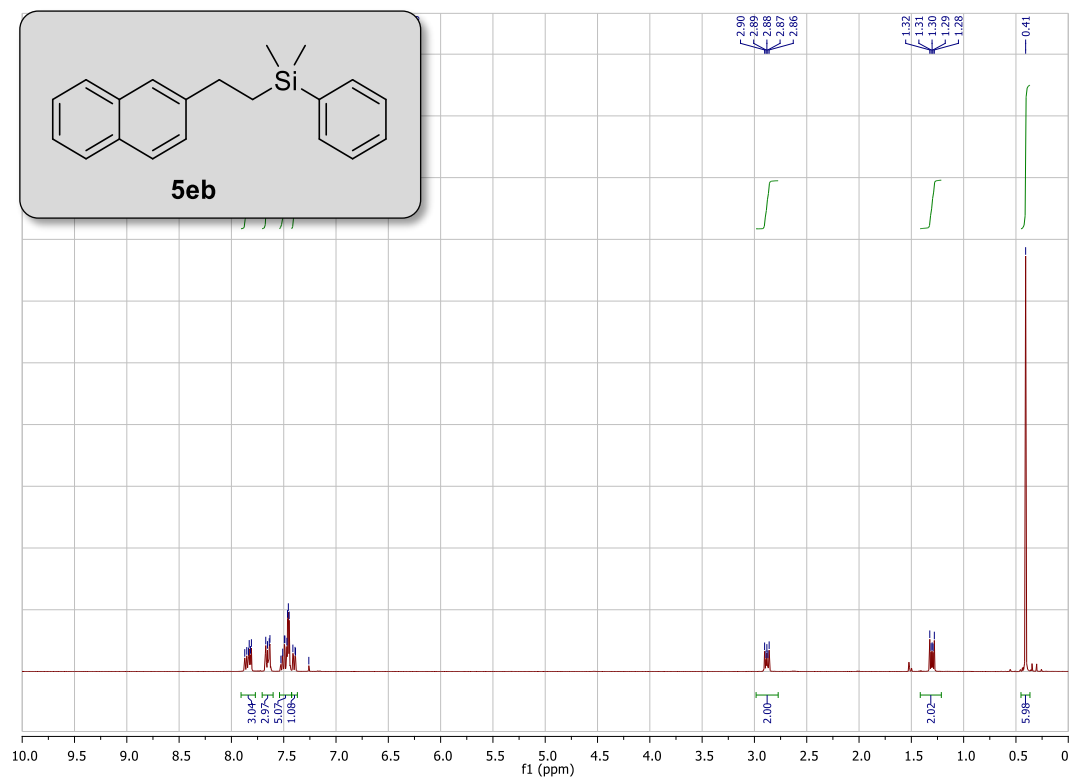

### <sup>13</sup>C-NMR

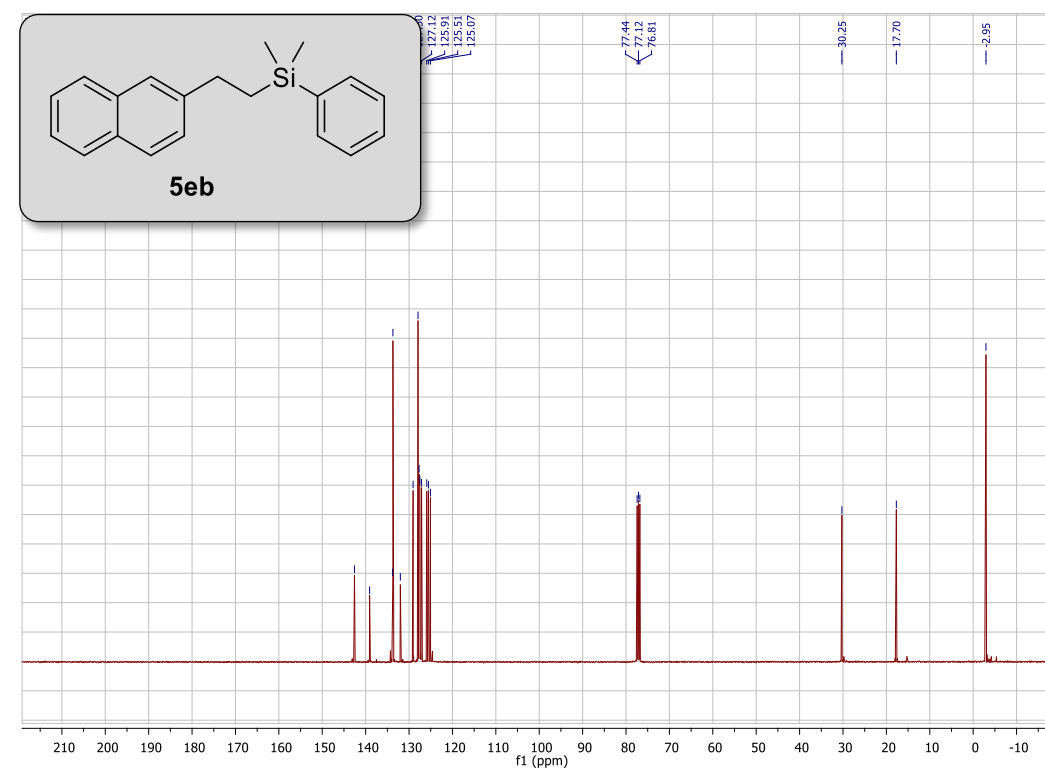

### <sup>1</sup>H-NMR

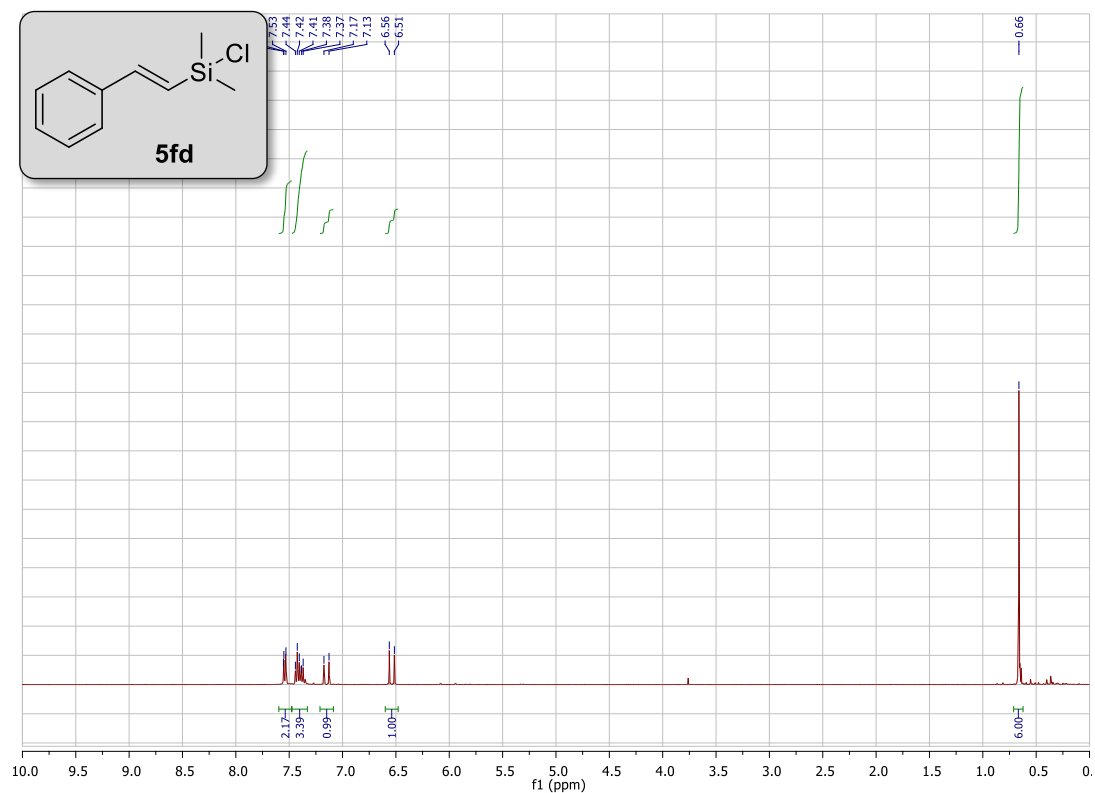

### <sup>13</sup>C-NMR

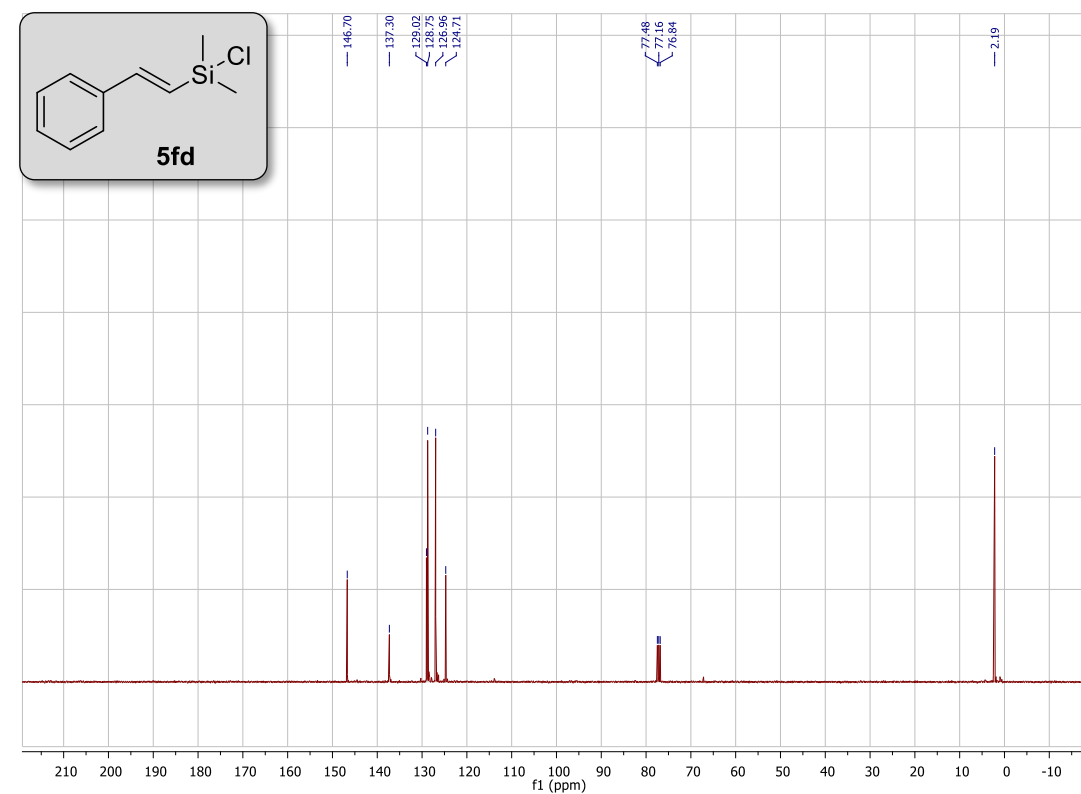

### <sup>1</sup>H-NMR

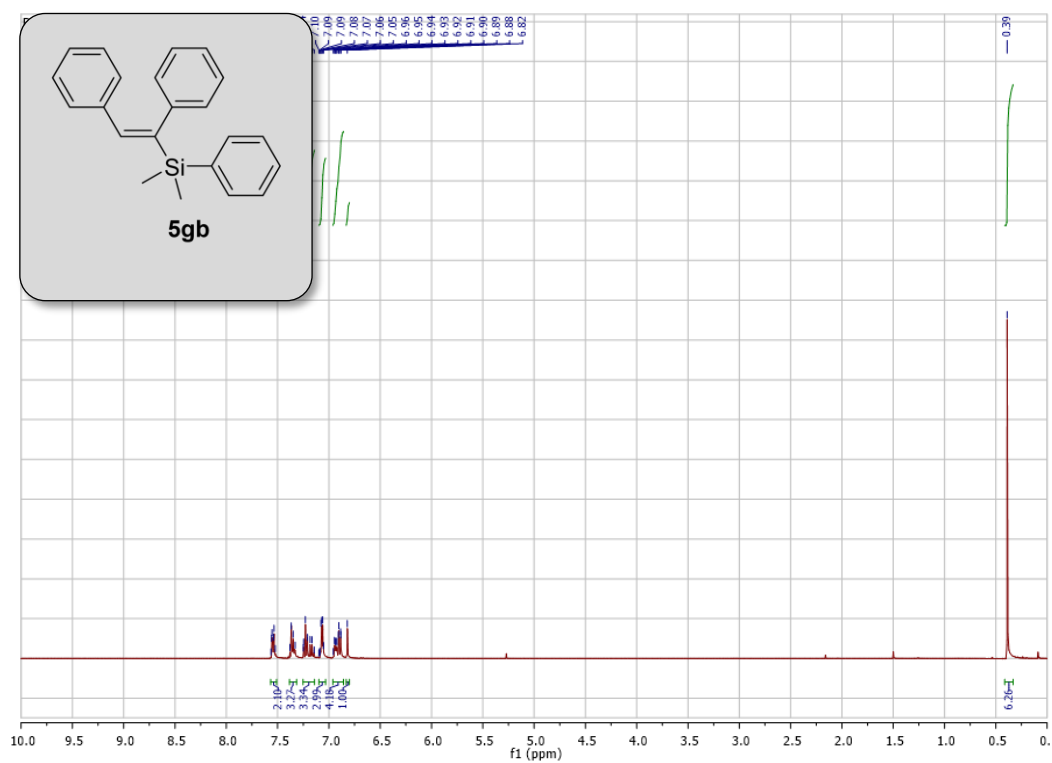

### <sup>13</sup>C-NMR

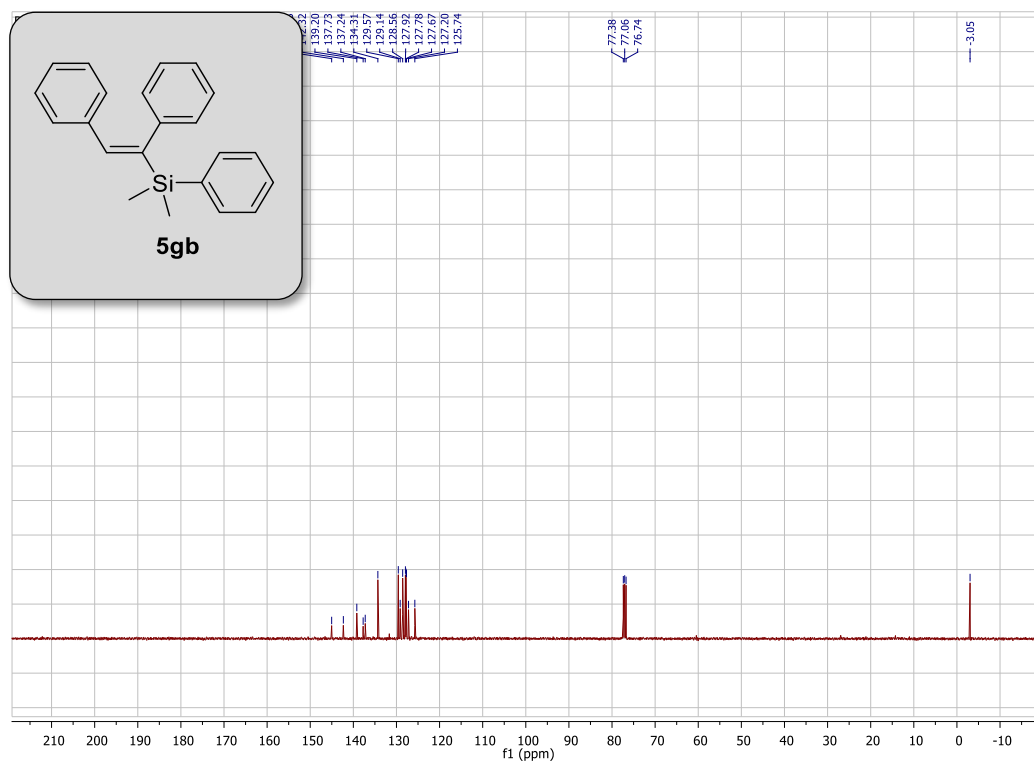



### <sup>1</sup>H-NMR

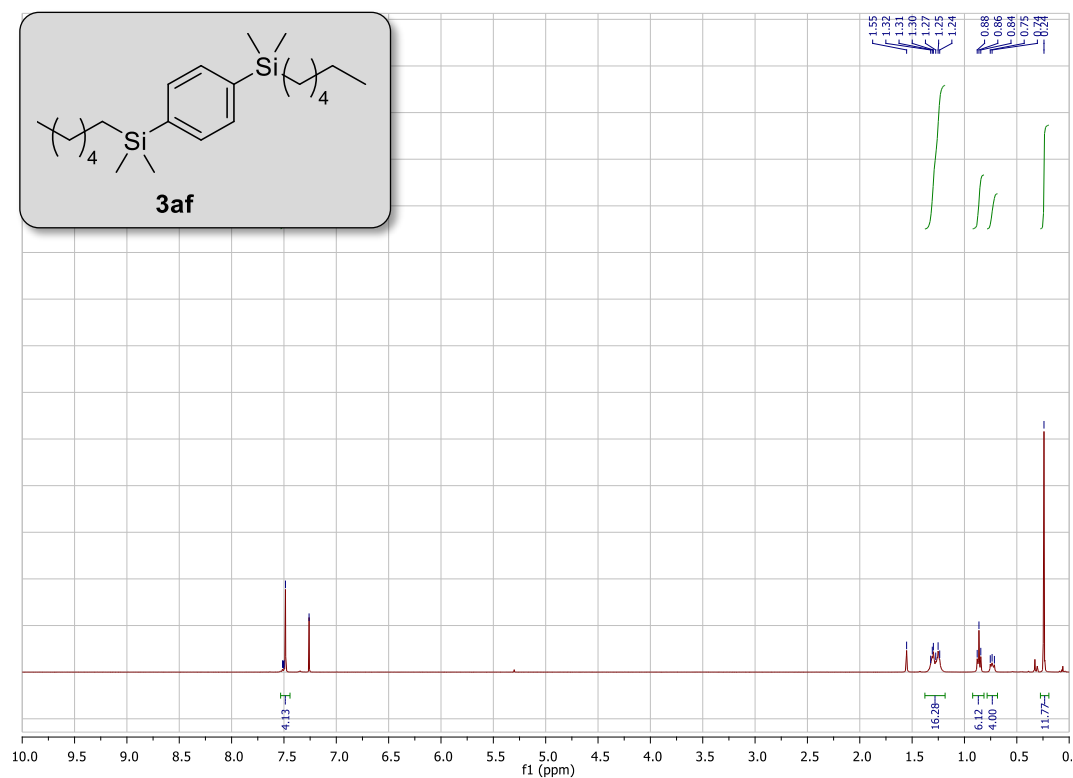

### <sup>13</sup>C-NMR

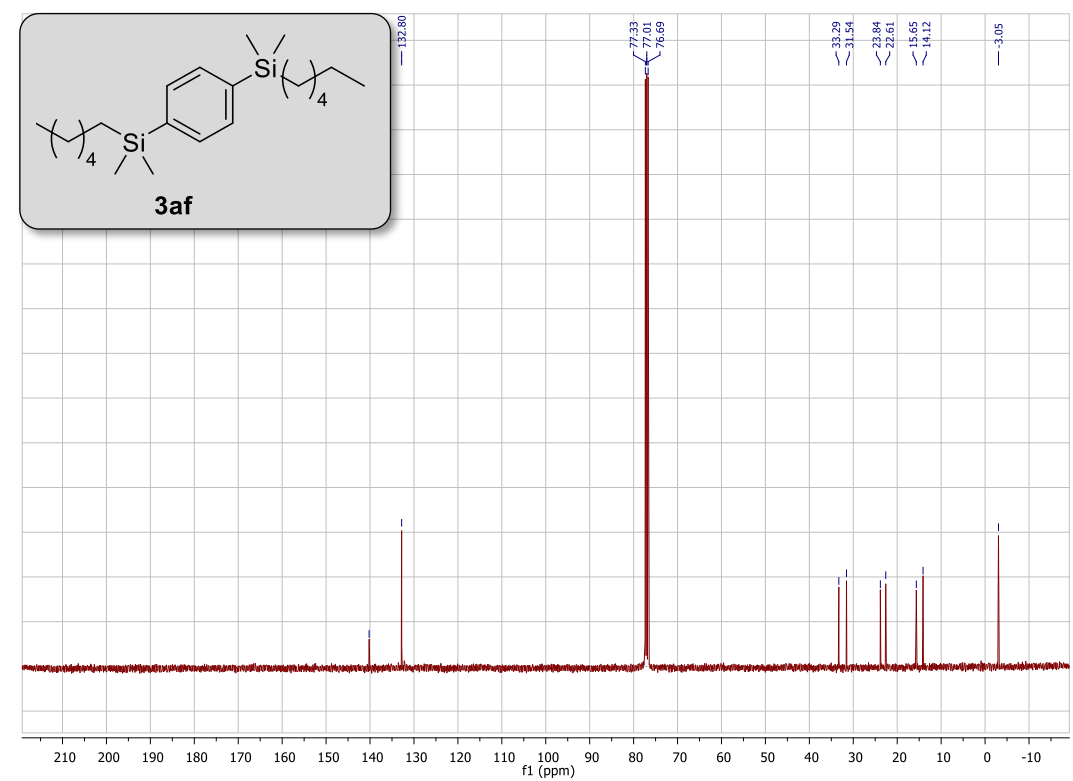

<sup>29</sup>Si-NMR

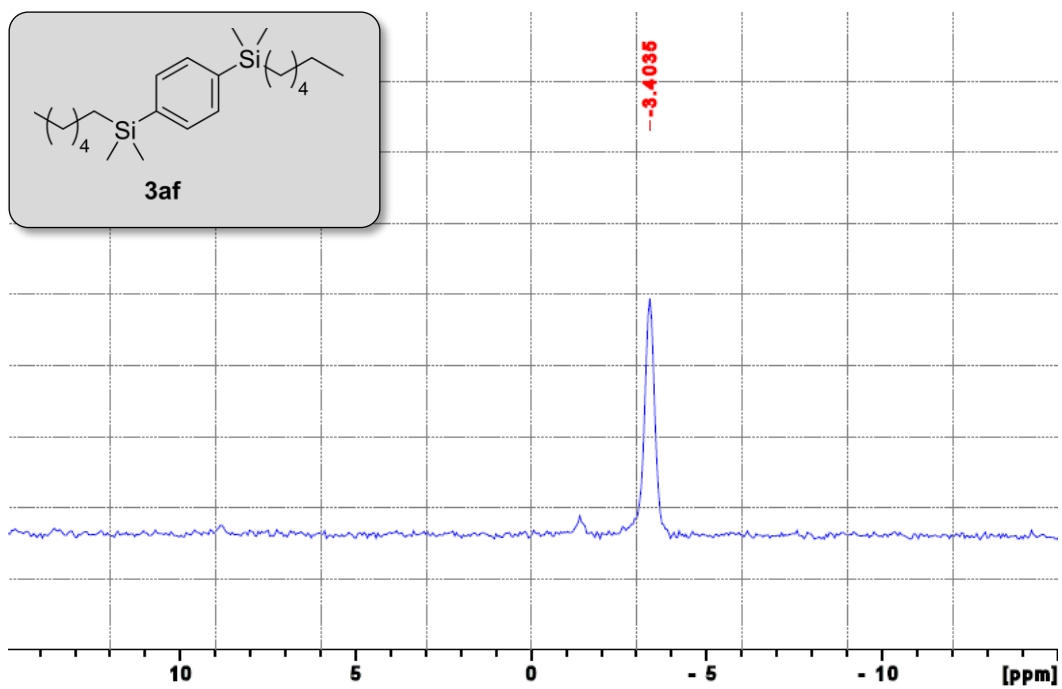

### <sup>1</sup>H-NMR

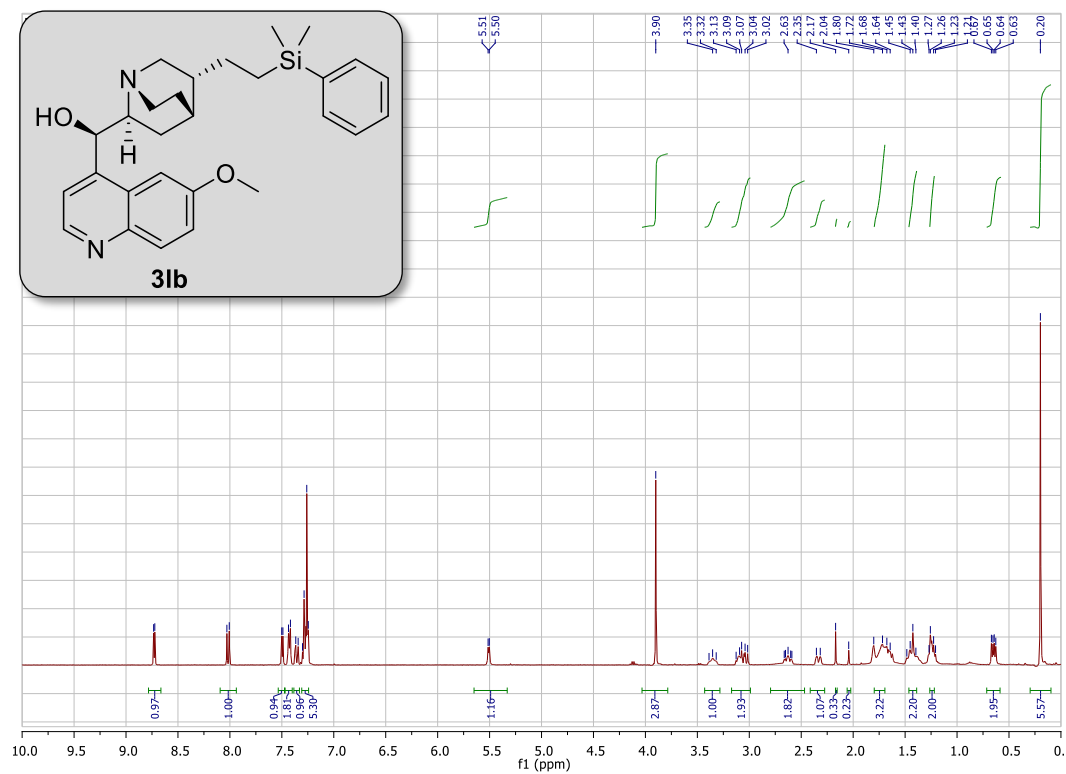

### <sup>13</sup>C-NMR

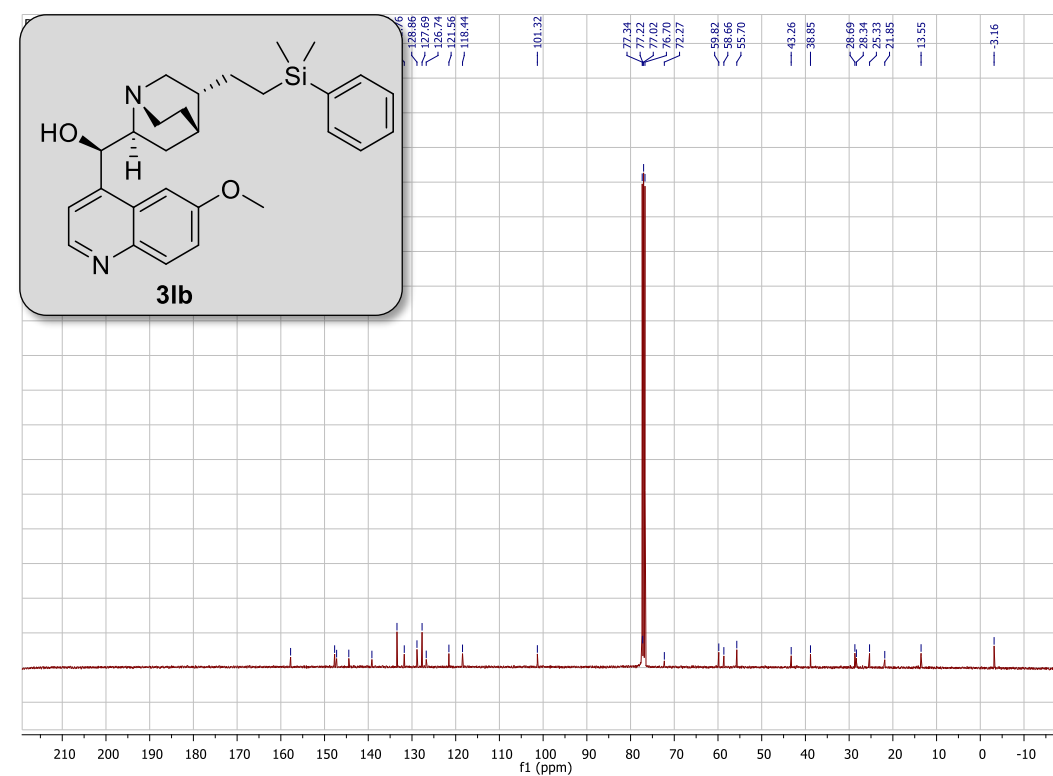

# <sup>1</sup>H-NMR

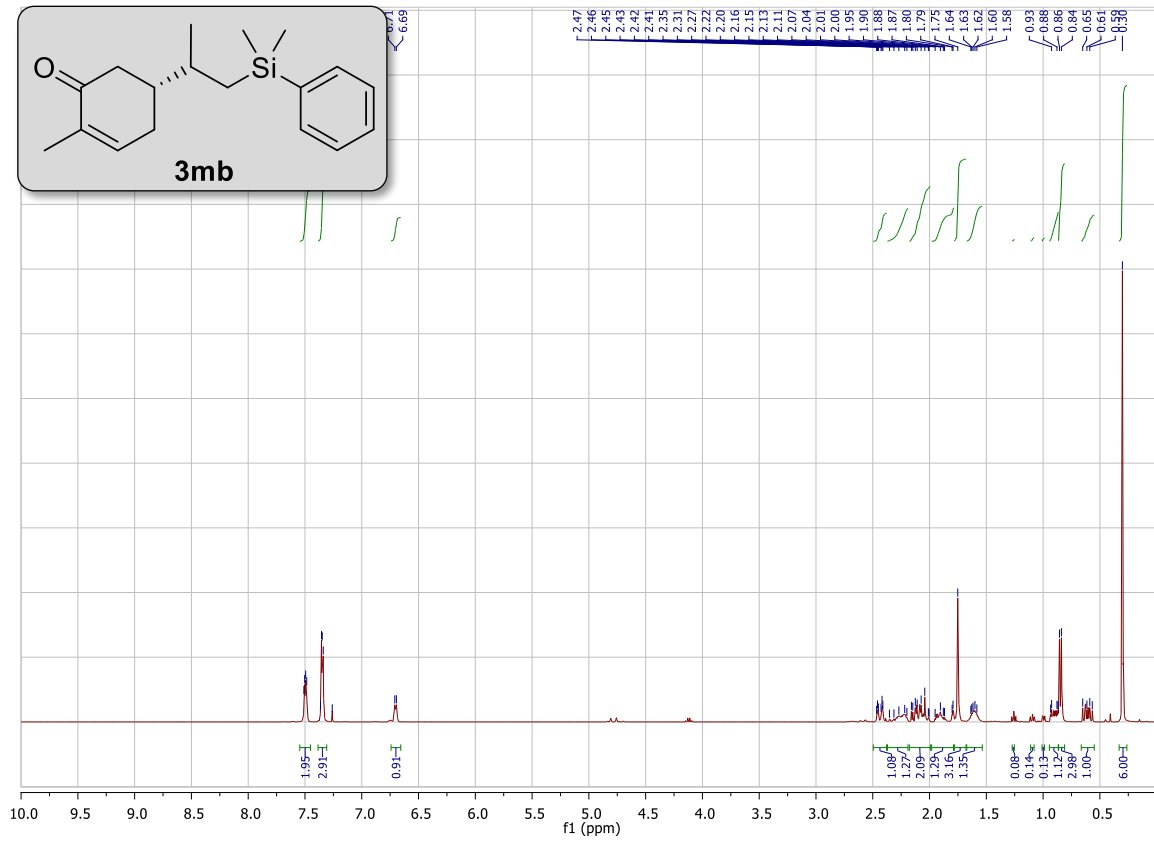

# <sup>13</sup>C-NMR

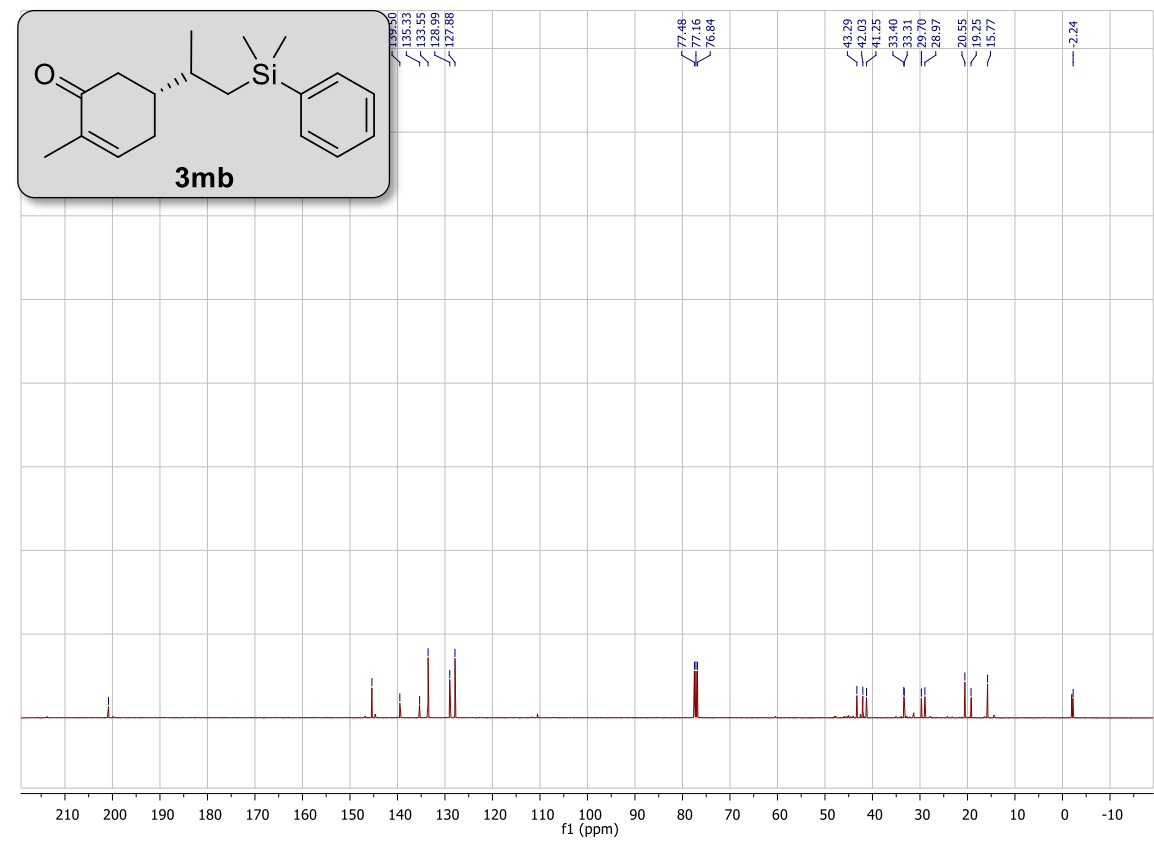

<sup>29</sup>Si-NMR

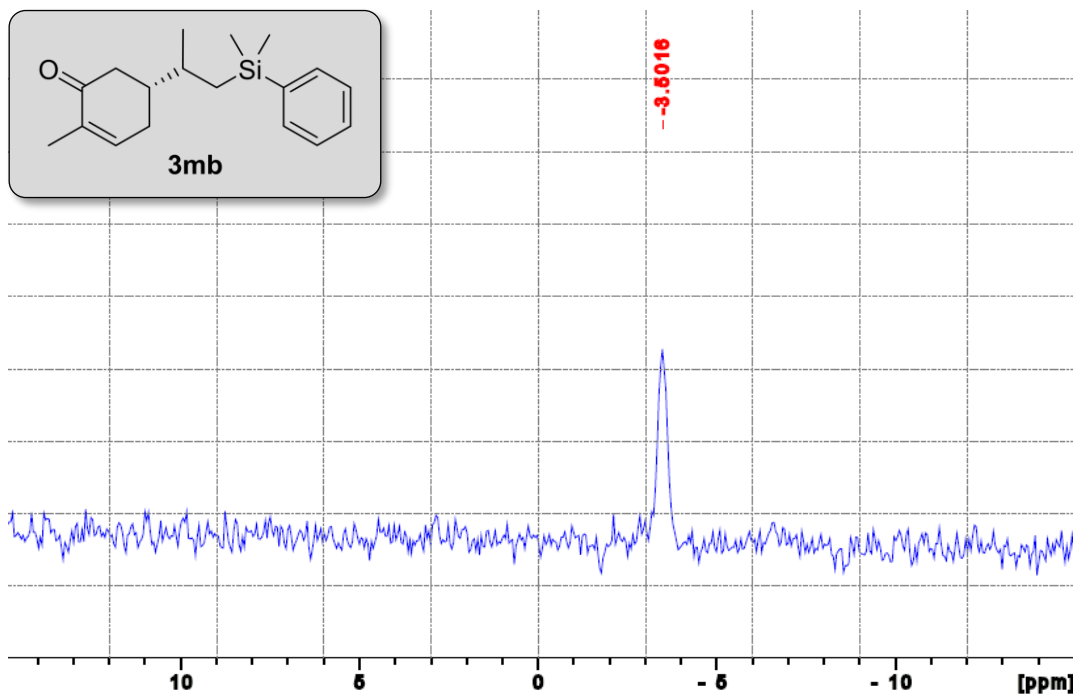



<sup>1</sup>H-NMR

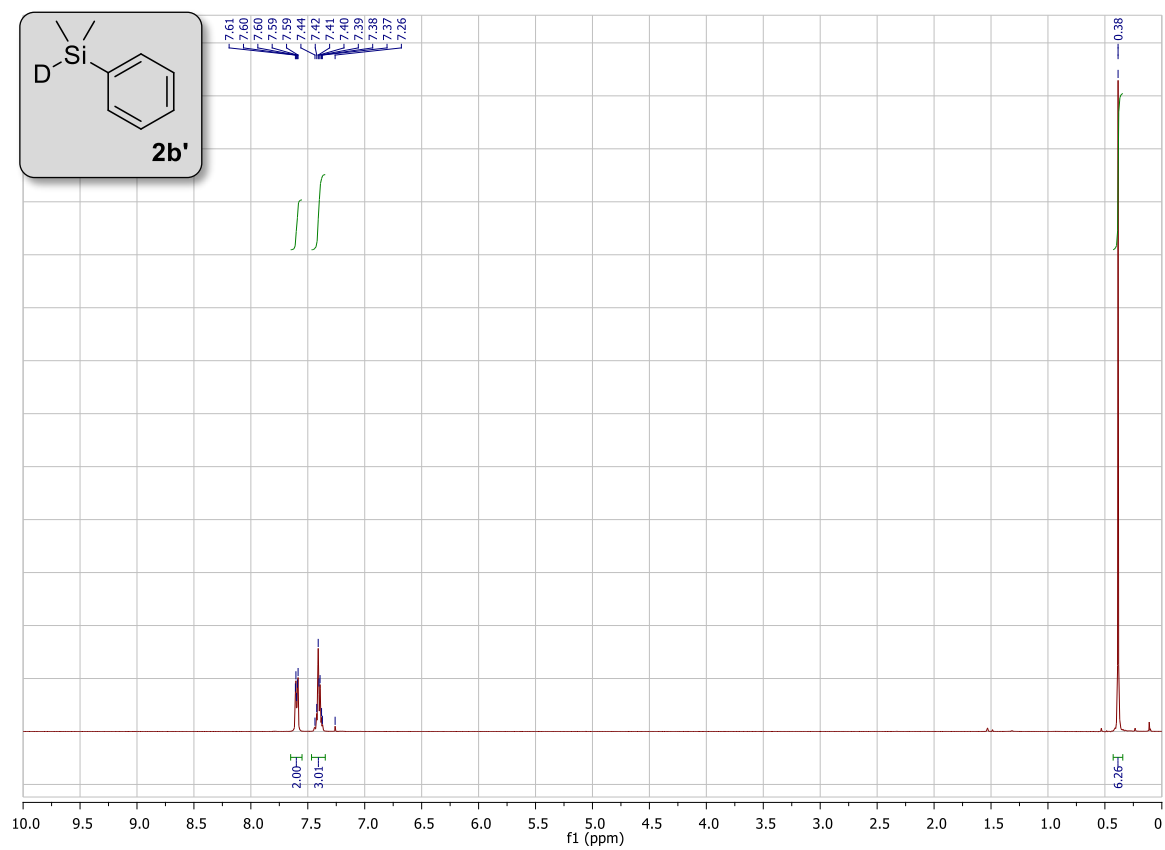

### <sup>1</sup>H-NMR

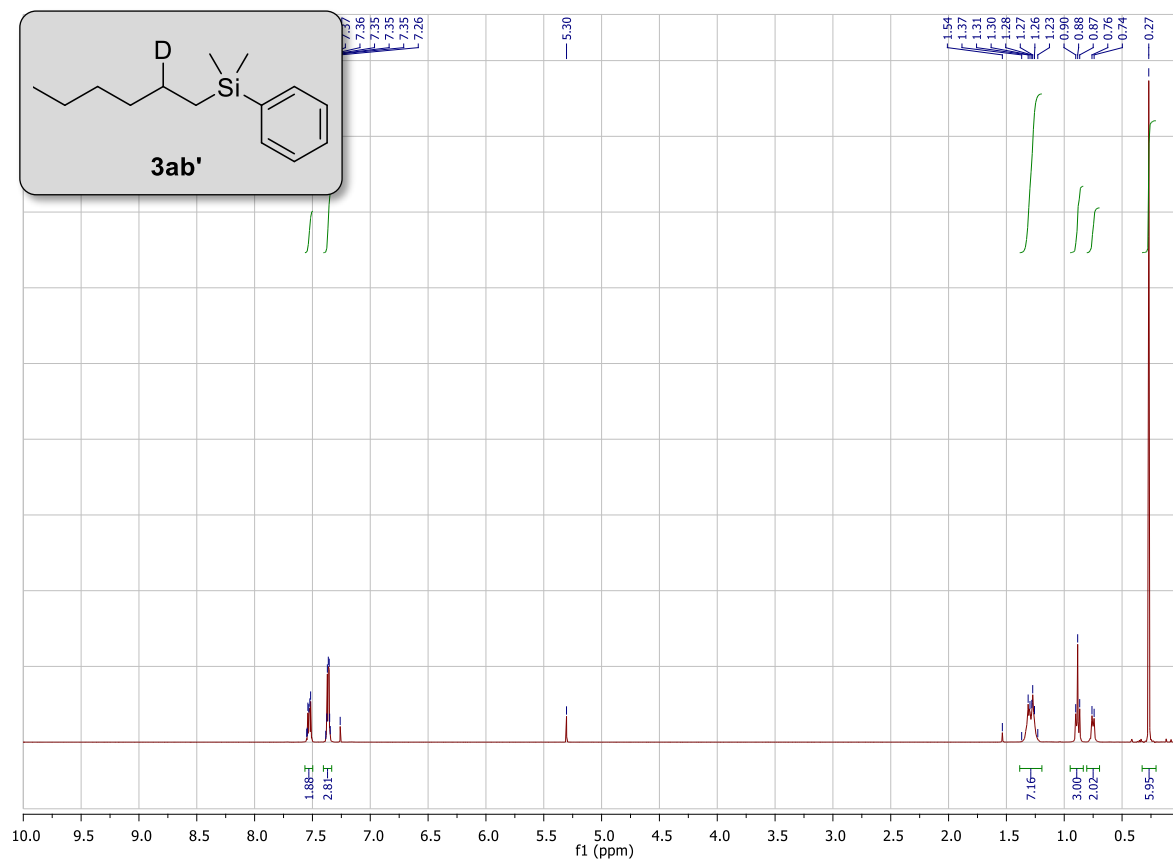

### <sup>13</sup>C-NMR

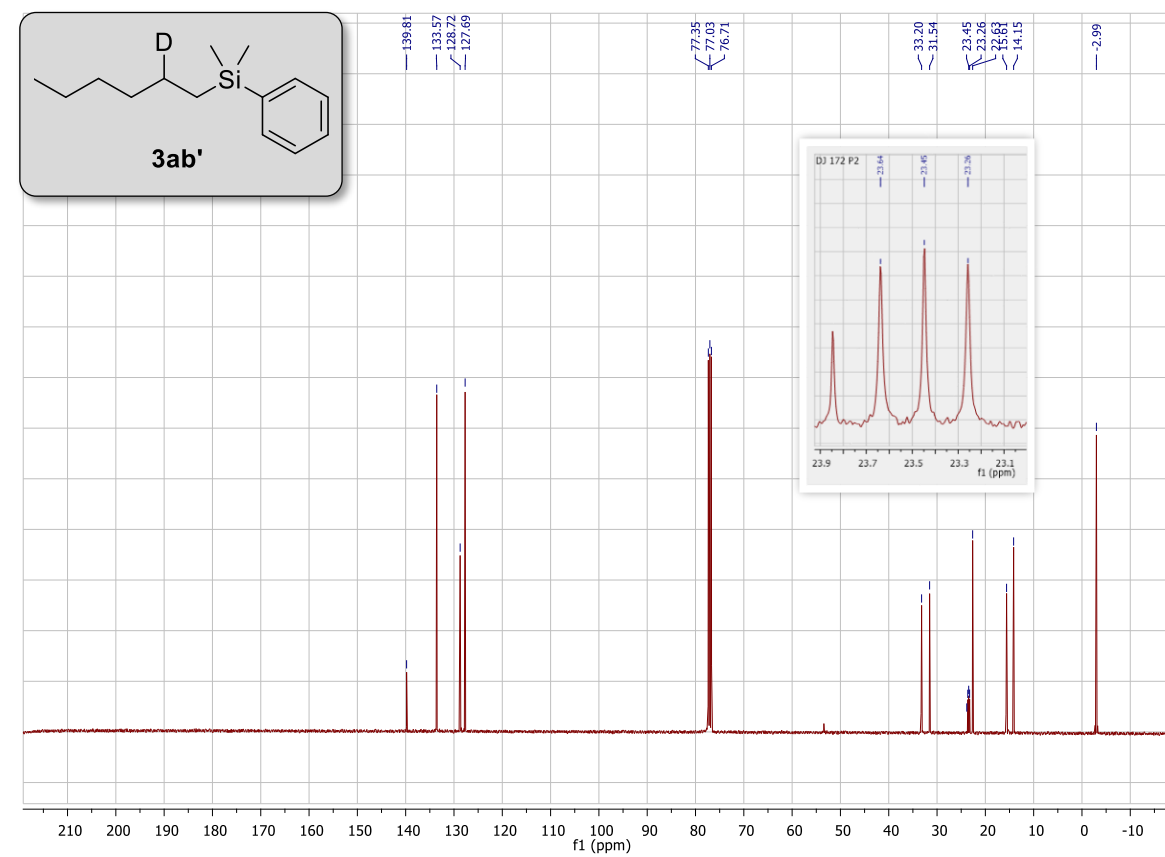



$^2\text{H-NMR}$

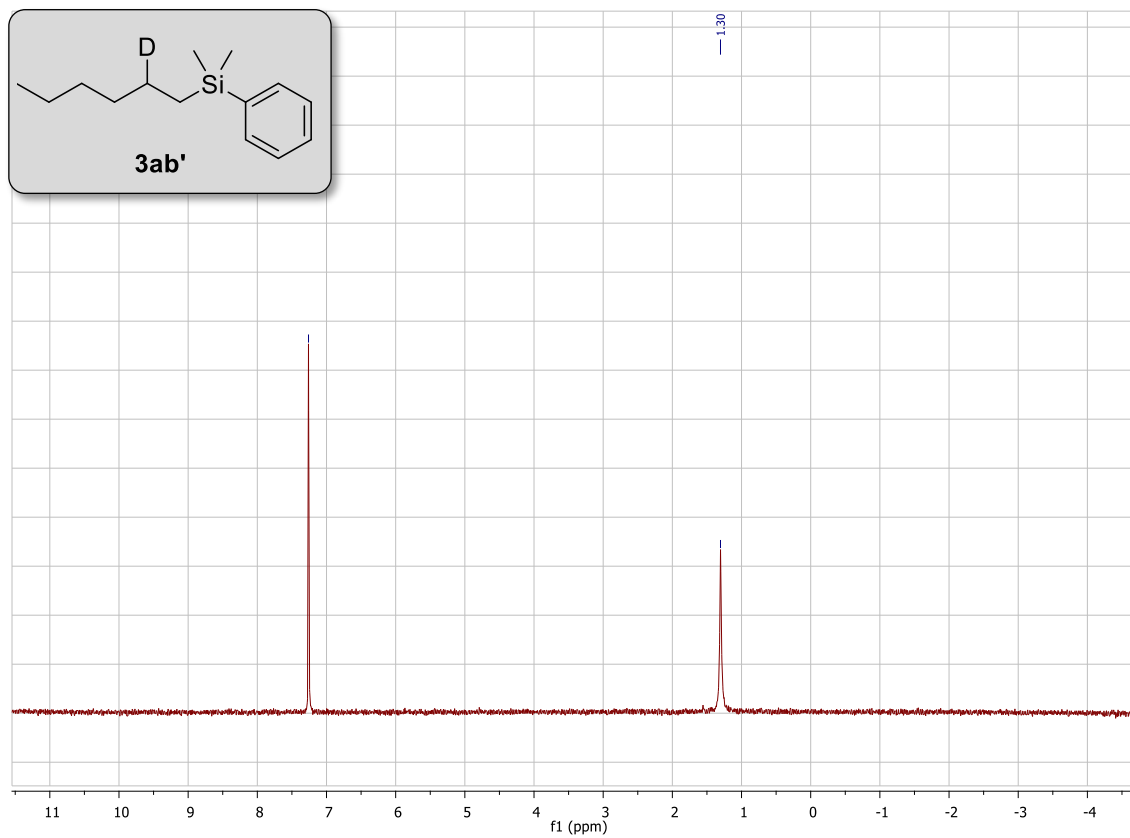

$^2\text{H-NMR}$  of the crude reaction mixture after 7 days (bottom).

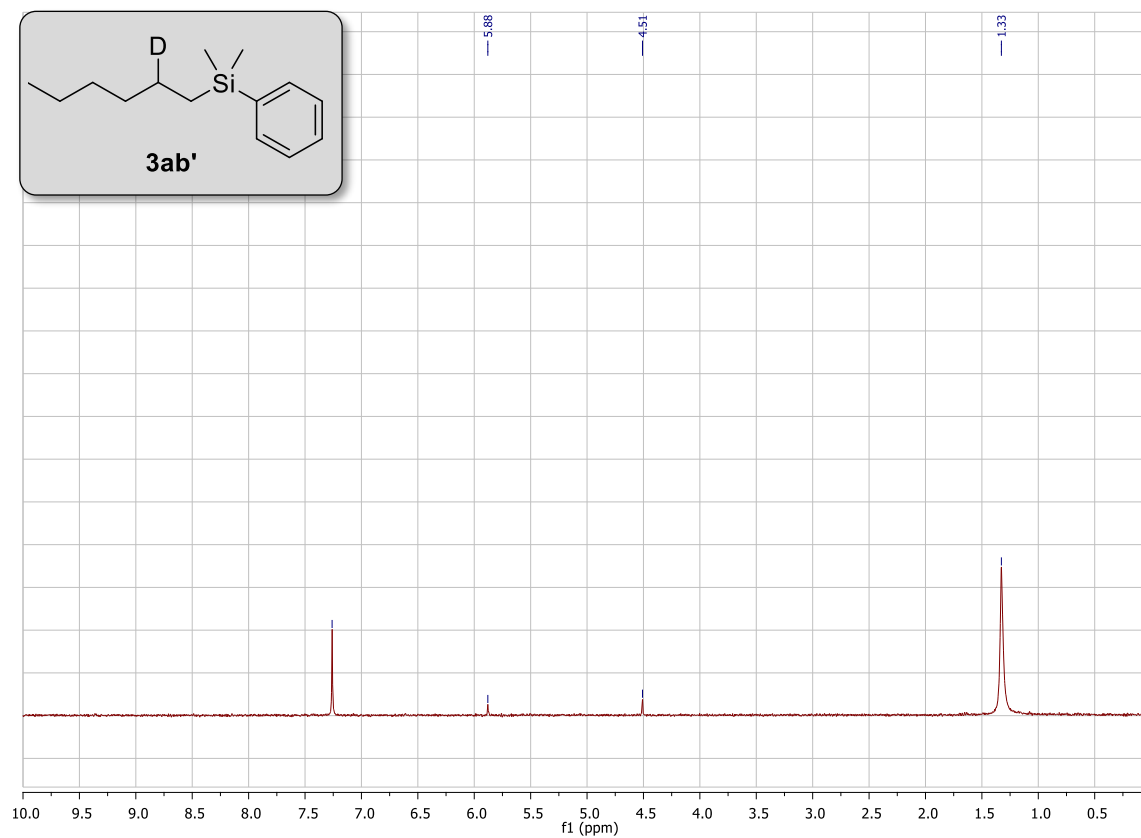

### 3. Supplementary Figures

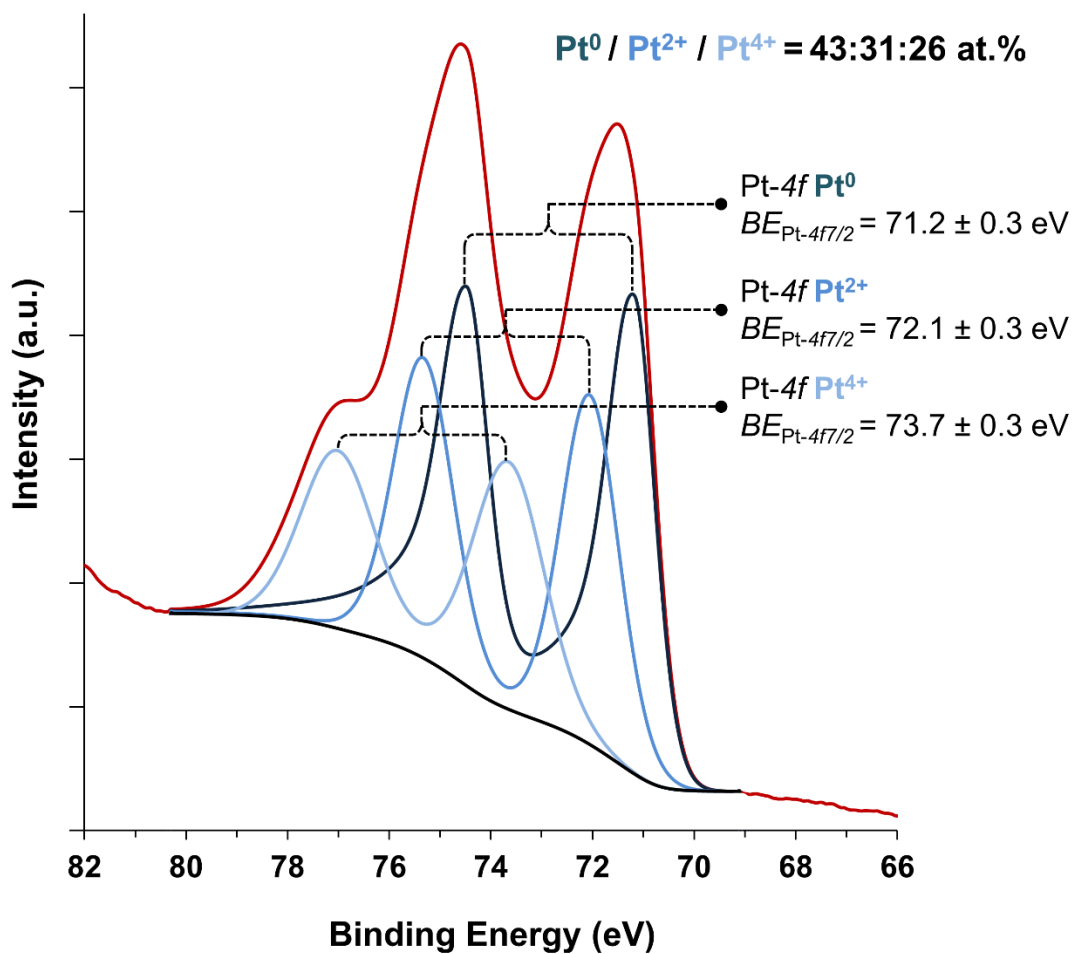

**Figure S1.** XPS spectrum obtained from fresh PtCNT catalyst highlighting Pt<sup>0</sup>, Pt<sup>2+</sup> and Pt<sup>4+</sup> contributions (Pt-4f region).

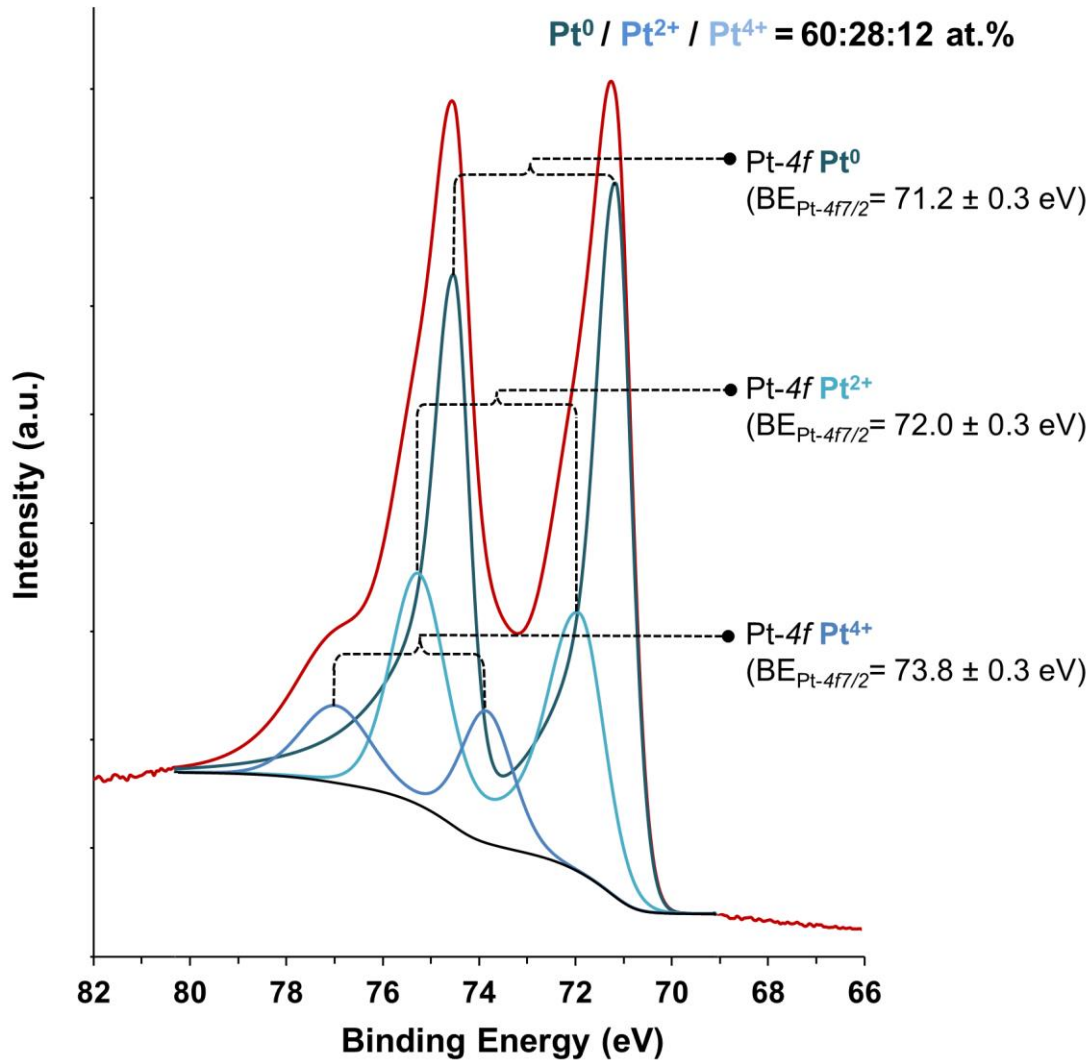

**Figure S2.** XPS spectrum obtained from recycled PtCNT catalyst highlighting  $\text{Pt}^0$ ,  $\text{Pt}^{2+}$  and  $\text{Pt}^{4+}$  contributions (Pt-4f region).

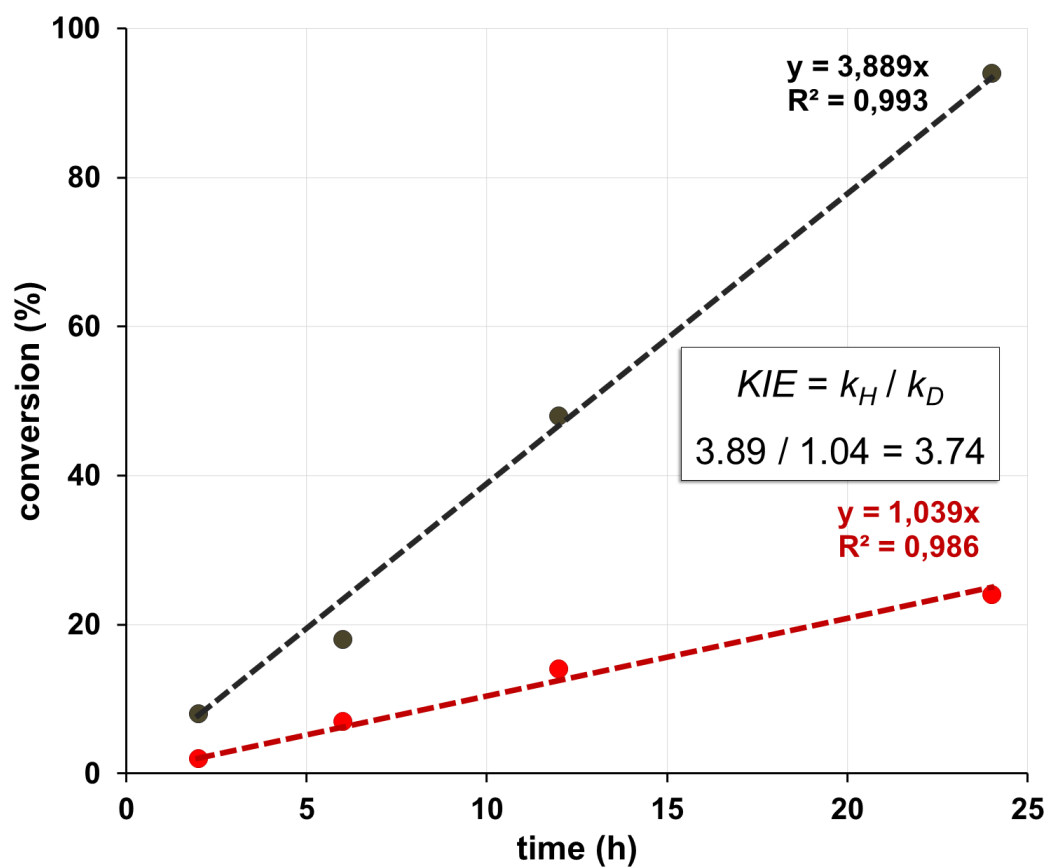

**Figure S3.** Determination of the kinetic isotopic effect based on the rates ( $k$ ) of the reaction of hex-1-ene with HSi(Me)<sub>2</sub>Ph (●) or DSi(Me)<sub>2</sub>Ph (●).

## 4. Supplementary Table

**Table S1.** Recycling experiment.<sup>a</sup>

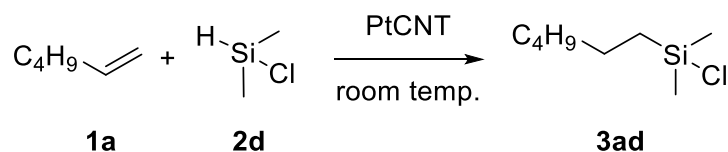

| entry | catalyst              | t (h) | yield (%) <sup>b</sup> |
|-------|-----------------------|-------|------------------------|
| 1     | Fresh                 | 24    | 97                     |
| 2     | 1 <sup>st</sup> reuse | 24    | 98                     |
| 3     | 2 <sup>nd</sup> reuse | 24    | 97                     |
| 4     | 3 <sup>rd</sup> reuse | 24    | 96                     |
| 5     | 4 <sup>th</sup> reuse | 24    | 97                     |
| 6     | 5 <sup>th</sup> reuse | 24    | 96                     |

<sup>a</sup> **1a** (1 mmol), **2d** (1.2 mmol), neat, PtCNT (0.04 mol%), room temperature. <sup>b</sup> Yield of isolated product.

<sup>1</sup> J. Li, J. Peng, G. Zhang, Y. Bai, G. Lai, X. Li, *New J. Chem* **2010**, *34*, 1330.

<sup>2</sup> C. Walter, P. Paul, *Organometallics* **1988**, *7*, 1373.

<sup>3</sup> H. Arii, Y. Yano, K. Nakabayashi, S. Yamaguchi, M. Yamamura, K. Mochida, T. Kawashima, *J. Org. Chem.* **2016**, *81*, 6314.

<sup>4</sup> M. Pérez, L. J. Hounjet, C. B. Caputo, R. Dobrovetsky, D. W. Stephan, *J. Am. Chem. Soc.* **2013**, *135*, 18308.

<sup>5</sup> K. Jakobsson, T. Chu, G. I. Nikonov, *ACS Catal.* **2016**, *6*, 7350.

<sup>6</sup> D. Khobragade, E. S. Stensrud, M. Mucha, J. R. Smith, R. Pohl, I. Stibor, J. Michl, *Langmuir*, **2010**, *26*, 8483.

<sup>7</sup> M. Takato, F. Shu, S. Min, Y. Jun, K. Keita, Y. Tomoko, M. Zen, M. Tomoo, J. Koichiro, K. Kiyotomi, *Green Chem.* **2019**, *21*, 4566.

<sup>8</sup> Rong Zhou, Yi Yiing Goh, Haiwang Liu, Hairong Tao, Lihua Li, Jie Wu, *Angew. Chem.*, **2017**, *56*, 16621.

<sup>9</sup> A. D. Ibrahim, S. W. Entsminger, L. Zhu, A. R. Fout, *ACS Catal.* **2016**, *6*, 3589.

<sup>10</sup> A. Taglietti, P. Grisoli, G. Dacarro, A. Gattesco, C. Mangano, Pallavicini, *New J. Chem.* **2018**, *42*, 7595.

<sup>11</sup> a) W. Xue, R. Shishido, M. Oestreich, *Angew. Chem. Int. Ed.* **2018**, *57*, 12141; b) C. K. Chu, Y. Liang, G. C. Fu, *J. Am. Chem. Soc.* **2016**, *138*, 6404.

<sup>12</sup> O. Iwao, C. Nuria, D. Robert J, I. Patrizia, *Organometallics*, **1990**, *9*, 3127.

<sup>13</sup> X. Caifeng, H. Bin, Y. Tao, C. Mingzhong, *Green Chem.*, **2018**, *20*, 391.

<sup>14</sup> A. D. Ibrahim, S. W. Entsminger, L. Zhu, A. R. Fout, *ACS Catal.*, **2016**, *6*, 3589.

<sup>15</sup> H. Go, U. Yasuhiro, *Chem. Lett.*, **2016**, *45*, 1244.

<sup>16</sup> Y. Sunada, D. Noda, H. Soejima, H. Tsutsumi, H. Nagashima, *Organometallics*, **2015**, *34*, 2896.

<sup>17</sup> S. Mallick, E.-U. Wuerthwein, A. Studer, *Org. Lett.*, **2020**, *22*, 6568.

<sup>18</sup> M. A. Brook, C. Henry, *Tetrahedron* **1996**, *52*, 861.

<sup>19</sup> D. Yanan, J. Guijie, Z. Shaochun, C. Xiufang, Y. Yong, *Catal. Sci. Technol.*, **2018**, *8*, 1039.

<sup>20</sup> I. Toru, W. Hee, G. Walzer, T. Don, *Chem. Mater.*, **1993**, *5*, 1487.

<sup>21</sup> N. Gandhamsetty, S. Park, S. Chang, *J. Am. Chem. Soc.*, **2015**, *137*, 15176.
